# Supplementary material for: Unveiling eccDNA Dynamics in Rice: Insights into Adaptation to Nutritional Stress
Source: Research Square preprint supplement (doi:10.21203/rs.3.rs-4803624/v1), 2024-08-05
Supplement: Supplementary file 1 [file 6b734ca5a6d2c533ba633902.xlsx]

## Sheet: content of supplementary tables
Content of supplementary tables
Supplementary Data 2.		Summarized GO enrichment on all differential ecGenes during optimal growth
Supplementary Data 3.		GeneIDs shown in pathways from GO analysis on exclusive ecGenes [Ctrl_D1 vs. Ctrl_D3]
Supplementary Data 4.		GeneIDs shown in pathways from GO analysis on exclusive ecGenes [Ctrl_D1 vs. Ctrl_D7]
Supplementary Data 5.		Summarized GO enrichment on all differential ecGenes under LN treatments
Supplementary Data 6.		GeneIDs shown in pathways from GO analysis on exclusive ecGenes [Ctrl_D3 vs. LN_D3]
Supplementary Data 7.		GeneIDs shown in pathways from GO analysis on exclusive ecGenes [Ctrl_D7 vs. LN_D7]
Supplementary Data 8.		Summarized GO enrichment on all differential ecGenes under LP treatments
Supplementary Data 9.		GeneIDs shown in pathways from GO analysis on exclusive ecGenes [Ctrl_D7 vs. LP_D7]
Supplementary Data 10.		GeneIDs shown in pathways from GO analysis on exclusive ecGenes [Ctrl_D14 vs. LP_D14]
Supplementary Data 11.		Detailed locations on major multiple-fragment eccDNAs with Os04g0343050, Os05g0372300, Os01g0791033, Os12g0423313 as core gene

## Sheet: Supplementary Data 2
Supplementary Data 2.1. Summarized GO enrichment on all differential ecGenes during optimal growth [Ctrl_D1 vs. Ctrl_D3]
Group	GO biological process complete	GOnumber	Oryza sativa - REFLIST (43658)	count	expected	over/under	fold Enrichment	raw P-value	FDR
Biological Process	regulation of short-day photoperiodism, flowering	GO:0048587	8	3	0.16	+	18.5	0.000431	0.0428
	regulation of cell cycle process	GO:0010564	87	8	1.76	+	4.54	0.000394	0.041
	chromosome organization	GO:0051276	185	12	3.75	+	3.2	0.000428	0.0435
	reproductive system development	GO:0061458	301	17	6.1	+	2.79	0.000164	0.0199
	post-embryonic development	GO:0009791	393	21	7.97	+	2.64	6.51e-05	0.00949
	DNA metabolic process	GO:0006259	462	24	9.37	+	2.56	3.18e-05	0.00514
	reproduction	GO:0000003	448	22	9.08	+	2.42	0.000149	0.0192
	reproductive process	GO:0022414	428	21	8.68	+	2.42	0.000212	0.0243
	organelle organization	GO:0006996	940	45	19.05	+	2.36	2.13e-07	8.48e-05
	intracellular transport	GO:0046907	471	22	9.55	+	2.3	0.000361	0.0384
	anatomical structure development	GO:0048856	820	34	16.62	+	2.05	0.000129	0.0171
	developmental process	GO:0032502	906	37	18.37	+	2.01	6.71e-05	0.00947
	protein modification process	GO:0036211	1537	62	31.16	+	1.99	4.22e-07	0.000132
	macromolecule modification	GO:0043412	1979	75	40.12	+	1.87	2.93e-07	9.85e-05
	nucleic acid metabolic process	GO:0090304	1823	68	36.95	+	1.84	1.59e-06	0.000348
	cellular component organization	GO:0016043	1892	68	38.35	+	1.77	5.67e-06	0.00108
	cellular component organization or biogenesis	GO:0071840	2176	78	44.11	+	1.77	1.5e-06	0.000346
	nucleobase-containing compound metabolic process	GO:0006139	2239	80	45.39	+	1.76	1.01e-06	0.000245
	heterocycle metabolic process	GO:0046483	2476	87	50.19	+	1.73	6.95e-07	0.000179
	macromolecule metabolic process	GO:0043170	5255	179	106.52	+	1.68	2.45e-12	1.78e-09
	protein metabolic process	GO:0019538	3092	105	62.68	+	1.68	2.74e-07	9.98e-05
	transport	GO:0006810	2302	78	46.66	+	1.67	1.26e-05	0.0022
	nitrogen compound metabolic process	GO:0006807	5873	197	119.05	+	1.65	4.9e-13	5.36e-10
	organic cyclic compound metabolic process	GO:1901360	2744	91	55.62	+	1.64	4.61e-06	0.000915
	cellular aromatic compound metabolic process	GO:0006725	2640	87	53.51	+	1.63	8.86e-06	0.00161
	organonitrogen compound metabolic process	GO:1901564	4115	134	83.41	+	1.61	3.92e-08	1.9e-05
	regulation of cellular process	GO:0050794	3603	116	73.04	+	1.59	6.94e-07	0.00019
	biological regulation	GO:0065007	4112	132	83.35	+	1.58	1.38e-07	6.03e-05
	localization	GO:0051179	2465	79	49.97	+	1.58	6.47e-05	0.00975
	regulation of biological process	GO:0050789	3849	123	78.02	+	1.58	5.62e-07	0.000164
	primary metabolic process	GO:0044238	7228	228	146.52	+	1.56	2.63e-12	1.64e-09
	cellular nitrogen compound metabolic process	GO:0034641	2917	92	59.13	+	1.56	3e-05	0.00505
	organic substance metabolic process	GO:0071704	7803	243	158.17	+	1.54	1.27e-12	1.11e-09
	regulation of metabolic process	GO:0019222	2587	80	52.44	+	1.53	0.000225	0.0253
	cellular process	GO:0009987	10976	321	222.49	+	1.44	1.32e-13	1.92e-10
	metabolic process	GO:0008152	9376	268	190.06	+	1.41	6.05e-10	3.31e-07
	cellular metabolic process	GO:0044237	6816	190	138.17	+	1.38	3.37e-06	0.000702
Molecular Function	DNA primase activity	GO:0003896	2	2	0.04	+	49.33	0.00041	0.03
	small molecule sensor activity	GO:0140299	37	6	0.75	+	8	9.27e-05	0.0072
	single-stranded DNA binding	GO:0003697	64	8	1.3	+	6.17	4.49e-05	0.00359
	ATPase-coupled transmembrane transporter activity	GO:0042626	182	13	3.69	+	3.52	9.63e-05	0.00726
	ATP-dependent activity	GO:0140657	783	40	15.87	+	2.52	1.31e-07	1.68e-05
	ATP hydrolysis activity	GO:0016887	511	26	10.36	+	2.51	2.16e-05	0.00184
	hydrolase activity, acting on acid anhydrides	GO:0016817	775	38	15.71	+	2.42	8.46e-07	8.67e-05
	catalytic activity, acting on a nucleic acid	GO:0140640	780	31	15.81	+	1.96	0.000442	0.0314
	sequence-specific DNA binding	GO:0043565	755	30	15.3	+	1.96	0.000574	0.0397
	purine ribonucleotide binding	GO:0032555	3259	122	66.06	+	1.85	5.96e-11	3.05e-08
	carbohydrate derivative binding	GO:0097367	3329	124	67.48	+	1.84	5.96e-11	2.54e-08
	nucleoside phosphate binding	GO:1901265	3631	129	73.6	+	1.75	5.15e-10	1.1e-07
	protein binding	GO:0005515	1859	66	37.68	+	1.75	1.47e-05	0.00129
	anion binding	GO:0043168	3795	133	76.93	+	1.73	5.34e-10	1.05e-07
	heterocyclic compound binding	GO:1901363	3779	132	76.6	+	1.72	7.43e-10	1.27e-07
	DNA binding	GO:0003677	2160	74	43.78	+	1.69	1.39e-05	0.00128
	hydrolase activity	GO:0016787	3339	111	67.68	+	1.64	2.67e-07	3.26e-05
	catalytic activity, acting on a protein	GO:0140096	3151	102	63.87	+	1.6	2.84e-06	0.00028
	nucleic acid binding	GO:0003676	3899	125	79.04	+	1.58	3.48e-07	4.06e-05
	organic cyclic compound binding	GO:0097159	7986	251	161.88	+	1.55	1.46e-13	9.33e-11
	transferase activity, transferring phosphorus-containing groups	GO:0016772	1973	62	39.99	+	1.55	0.000749	0.0505
	small molecule binding	GO:0036094	7183	218	145.6	+	1.5	3.7e-10	1.05e-07
	ion binding	GO:0043167	7031	213	142.52	+	1.49	6.53e-10	1.2e-07
	binding	GO:0005488	11619	342	235.53	+	1.45	4.05e-15	3.46e-12
	transferase activity	GO:0016740	4300	126	87.16	+	1.45	2.94e-05	0.00243
	catalytic activity	GO:0003824	10095	284	204.63	+	1.39	7.79e-10	1.17e-07
Cellcular Component	chromosome	GO:0005694	353	19	7.16	+	2.66	0.00013	0.0085
	nuclear protein-containing complex	GO:0140513	624	31	12.65	+	2.45	8.41e-06	0.000651
	transferase complex	GO:1990234	505	23	10.24	+	2.25	0.000345	0.0196
	intracellular organelle lumen	GO:0070013	650	27	13.18	+	2.05	0.000586	0.0263
	membrane-enclosed lumen	GO:0031974	650	27	13.18	+	2.05	0.000586	0.025
	catalytic complex	GO:1902494	1019	41	20.66	+	1.98	3.98e-05	0.00282
	protein-containing complex	GO:0032991	2699	93	54.71	+	1.7	6.48e-07	6.91e-05
	intracellular non-membrane-bounded organelle	GO:0043232	1580	53	32.03	+	1.65	0.000367	0.0196
	non-membrane-bounded organelle	GO:0043228	1580	53	32.03	+	1.65	0.000367	0.0184
	endomembrane system	GO:0012505	1546	51	31.34	+	1.63	0.000855	0.0331
	nucleus	GO:0005634	4413	135	89.45	+	1.51	1.48e-06	0.000126
	intracellular anatomical structure	GO:0005622	10370	293	210.21	+	1.39	1.87e-10	3.98e-08
	organelle	GO:0043226	8840	247	179.19	+	1.38	3.52e-08	6e-06
	intracellular organelle	GO:0043229	8820	246	178.79	+	1.38	4.39e-08	6.23e-06
	membrane-bounded organelle	GO:0043227	8078	223	163.75	+	1.36	5.78e-07	7.04e-05
	intracellular membrane-bounded organelle	GO:0043231	8057	221	163.32	+	1.35	1.11e-06	0.000105
	cytoplasm	GO:0005737	6442	171	130.58	+	1.31	0.000183	0.0111
	cellular anatomical entity	GO:0110165	17066	448	345.94	+	1.3	2.72e-12	7.72e-10
	membrane	GO:0016020	8571	216	173.74	+	1.24	0.000446	0.0211
Supplementary Data 2.2. Summarized GO enrichment on all differential ecGenes during optimal growth [Ctrl_D1 vs. Ctrl_D7]
Group	GO biological process complete	GOnumber	Oryza sativa - REFLIST (43658)	count	expected	over/under	fold Enrichment	raw P-value	FDR
Biological Process	lysyl-tRNA aminoacylation	GO:0006430	2	2	0.01	+	100	5.29e-05	0.0385
	flower development	GO:0009908	130	7	0.95	+	7.39	5e-05	0.0437
	cellular developmental process	GO:0048869	200	9	1.46	+	6.18	1.8e-05	0.0196
	cellular process	GO:0009987	10976	122	79.95	+	1.53	1.73e-07	0.000252
Molecular Function	lysine-tRNA ligase activity	GO:0004824	2	2	0.01	+	100	5.29e-05	0.0194
	purine nucleotide binding	GO:0017076	3407	46	24.82	+	1.85	5.3e-05	0.017
	carbohydrate derivative binding	GO:0097367	3329	44	24.25	+	1.81	0.000117	0.023
	catalytic activity, acting on a protein	GO:0140096	3151	41	22.95	+	1.79	0.000293	0.0417
	nucleoside phosphate binding	GO:1901265	3631	47	26.45	+	1.78	0.000135	0.023
	heterocyclic compound binding	GO:1901363	3779	47	27.53	+	1.71	0.000285	0.043
	organic cyclic compound binding	GO:0097159	7986	94	58.17	+	1.62	8.8e-07	0.000752
	ion binding	GO:0043167	7031	81	51.21	+	1.58	1.62e-05	0.00828
	small molecule binding	GO:0036094	7183	81	52.32	+	1.55	3.74e-05	0.016
	catalytic activity	GO:0003824	10095	105	73.53	+	1.43	5.68e-05	0.0162
	binding	GO:0005488	11619	120	84.63	+	1.42	1.35e-05	0.00867
Cellcular Component	intracellular anatomical structure	GO:0005622	10370	105	75.53	+	1.39	0.000199	0.0423
	cellular anatomical entity	GO:0110165	17066	170	124.3	+	1.37	2.36e-07	6.71e-05
Supplementary Data 2.3. Summarized GO enrichment on all differential ecGenes during optimal growth [Ctrl_D1 vs. Ctrl_D14]
Group	GO biological process complete	GOnumber	Oryza sativa - REFLIST (43658)	count	expected	over/under	fold Enrichment	raw P-value	FDR
Biological Process	recombinational repair	GO:0000725	84	6	0.77	+	7.8	0.000127	0.0326
	DNA damage response	GO:0006974	341	14	3.12	+	4.48	3.95e-06	0.00288
	DNA metabolic process	GO:0006259	462	14	4.23	+	3.31	0.00011	0.0301
	nucleic acid metabolic process	GO:0090304	1823	37	16.7	+	2.22	7.14e-06	0.00446
	nucleobase-containing compound metabolic process	GO:0006139	2239	41	20.51	+	2	3.01e-05	0.011
	heterocycle metabolic process	GO:0046483	2476	43	22.68	+	1.9	7.2e-05	0.0225
	cellular nitrogen compound metabolic process	GO:0034641	2917	48	26.73	+	1.8	0.000109	0.0317
	regulation of biological process	GO:0050789	3849	58	35.26	+	1.64	0.000177	0.0431
	macromolecule metabolic process	GO:0043170	5255	79	48.15	+	1.64	9.15e-06	0.005
	primary metabolic process	GO:0044238	7228	107	66.22	+	1.62	2.25e-07	0.000246
	nitrogen compound metabolic process	GO:0006807	5873	85	53.81	+	1.58	1.7e-05	0.00826
	organic substance metabolic process	GO:0071704	7803	111	71.49	+	1.55	1.02e-06	0.000893
	cellular process	GO:0009987	10976	154	100.56	+	1.53	3.66e-09	5.33e-06
	cellular metabolic process	GO:0044237	6816	95	62.45	+	1.52	2.16e-05	0.00942
	metabolic process	GO:0008152	9376	120	85.9	+	1.4	6.52e-05	0.0219
Molecular Function	DNA-directed 5'-3' RNA polymerase activity	GO:0003899	45	5	0.41	+	12.13	5.69e-05	0.0208
	RNA polymerase activity	GO:0097747	51	5	0.47	+	10.7	0.000105	0.0298
	nucleotidyltransferase activity	GO:0016779	165	8	1.51	+	5.29	0.000152	0.039
	catalytic activity, acting on a nucleic acid	GO:0140640	780	20	7.15	+	2.8	4.31e-05	0.0221
	DNA binding	GO:0003677	2160	38	19.79	+	1.92	0.000165	0.0385
	nucleic acid binding	GO:0003676	3899	68	35.72	+	1.9	2.35e-07	0.000201
	organic cyclic compound binding	GO:0097159	7986	106	73.17	+	1.45	5.14e-05	0.0219
	binding	GO:0005488	11619	152	106.45	+	1.43	6.55e-07	0.000419
Cellcular Component	Rad51B-Rad51C-Rad51D-XRCC2 complex	GO:0033063	4	2	0.04	+	54.57	0.000496	0.0325
	DNA recombinase mediator complex	GO:0033061	4	2	0.04	+	54.57	0.000496	0.0302
	chromosome	GO:0005694	353	11	3.23	+	3.4	0.000467	0.0331
	nuclear protein-containing complex	GO:0140513	624	16	5.72	+	2.8	0.000247	0.0191
	nucleus	GO:0005634	4413	75	40.43	+	1.85	1.61e-07	1.96e-05
	intracellular anatomical structure	GO:0005622	10370	151	95.01	+	1.59	3.82e-10	3.25e-07
	intracellular organelle	GO:0043229	8820	127	80.81	+	1.57	4.23e-08	7.21e-06
	organelle	GO:0043226	8840	127	80.99	+	1.57	5.89e-08	8.36e-06
	intracellular membrane-bounded organelle	GO:0043231	8057	114	73.82	+	1.54	9.92e-07	0.000106
	membrane-bounded organelle	GO:0043227	8078	114	74.01	+	1.54	1.03e-06	9.71e-05
	cytoplasm	GO:0005737	6442	87	59.02	+	1.47	0.000163	0.0139
	cellular anatomical entity	GO:0110165	17066	211	156.36	+	1.35	3.04e-08	6.48e-06

## Sheet: Supplementary Data 3
Supplementary Data 3.1. GeneIDs shown in "Regulation of short-day photoperiodism, flowering" pathway from GO analysis on exclusive ecGenes [Ctrl_D1 vs. Ctrl_D3]
GO (ID)	Biological Process Pathway					geneIDs	gene symbol(s)	Description
GO:0048587	regulation of short-day photoperiodism, flowering					Os09g0240200	OsCO3, OsB, OsBBX27, OsCCT31	CONSTANS-like protein, Control of flowering time under SD conditions
						Os01g0922800	OsMADS51, OsMADS65, OsDLN36	MADS-box transcription factor, Short-day flowering promoter
						Os03g0307800	OsSET1, OsEZ1/OsiEZ1, OsSET15, SDG718, OsDLN84	Polycomb repressive complex2 (PRC2) key subunit, Enhancer of zeste [E(z)] genes, Short day promotion of flowering
Supplementary Data 3.2. GeneIDs shown in "Nitrogen compound metabolic process" pathway from GO analysis on exclusive ecGenes [Ctrl_D1 vs. Ctrl_D3]
GO (ID)	Biological Process Pathway					geneIDs	gene symbol(s)	Description
GO:0006807	nitrogen compound metabolic process					Os02g0513800	\	Ovarian tumour, otubain domain containing protein
						Os05g0274200	OsMSH2	DNA mismatch repair gene
						Os10g0101200	OsSCP45, OsSCP46	Serine carboxypeptidase, Regulation of grain filling and seed germination
						Os08g0436200	OsGT47A	Zinc finger, RING/FYVE/PHD-type domain containing protein
						Os01g0926600	\	Similar to Pectin-glucuronyltransferase
						Os01g0253100	\	Similar to Avr9/Cf-9 induced kinase 1
						Os01g0205300	\	Similar to rho termination factor, N-terminal domain containing protein
						Os03g0586800	\	Similar to Lysyl-tRNA synthetase
						Os11g0130100	\	Conserved hypothetical protein
						Os05g0494100	OsDrAp2, OsHAPL1, OsDLN150	Histone-like transcription factor, Transcriptional repressor, Repressor of heading date, Inhibition of flowering under long-day condition
						Os04g0434300	\	MiaB-like tRNA modifying enzyme, archaeal-type domain containing protein
						Os08g0130600	\	BTB domain containing protein
						Os08g0510900	\	Nse4 domain containing protein
						Os07g0446100	OsRING270	Zinc finger, RING/FYVE/PHD-type domain containing protein
						Os10g0191600	\	Similar to 006-203-B11, full insert sequence
						Os03g0352500	OsINO80, OsCHR732	Chromatin-remodeling factor, Regulation of gibberellin biosynthesis, Plant growth and development
						Os02g0316900	\	B-block binding subunit of TFIIIC domain containing protein
						Os05g0553000	RMtATPb	Similar to ATP synthase subunit beta, mitochondrial
						Os07g0531700	\	NUC153 domain containing protein
						Os05g0467000	OsCDPK16, OsCPK16	Similar to Calcium-dependent protein kinase
						Os09g0326800	OsRpn1a	Similar to PSMD2 subunit
						Os05g0363600	\	Similar to Catalytic/ oxidoreductase, acting on NADH or NADPH
						Os11g0549300	OsLysM-RLK8, OsRLCK330	Similar to Protein kinase domain containing protein, expressed
						Os03g0449200	SHO2/SHL4, OsAGO7	Orthologue of Arabidopsis ARGONAUTE 7, Regulation of leaf domain development along the central-marginal axis
						Os03g0646800	\	Similar to DNA-directed RNA polymerase
						Os03g0701100	\	Similar to Prp18 domain containing protein, expressed
						Os05g0141400	\	tRNA/rRNA methyltransferase, SpoU domain containing protein
						Os09g0433900	OsEnS-128, OsAlaAT5	Similar to Alanine aminotransferase 2
						Os01g0925000	\	ENTH/VHS domain containing protein
						Os06g0663100	\	Similar to Pseudouridylate synthase
						Os04g0589700	OsPUB35	Zinc finger, RING/FYVE/PHD-type domain containing protein
						Os12g0613250	OsBTBN25	Similar to BTB/POZ%3B Superoxide dismutase, copper/zinc binding%3B NPH3
						Os05g0309000	\	Hypothetical conserved gene
						Os11g0431100	OsSCP51	Similar to Serine carboxypeptidase family protein
						Os02g0634800	OsUBC32	Ubiquitin-conjugating enzyme/RWD-like domain containing protein
						Os08g0177700	\	Similar to LSM7-like
						Os03g0837000	\	Dcp1-like decapping domain containing protein
						Os07g0693500	\	Similar to AMP deaminase 2
						Os06g0498900	\	GTP-binding protein, HSR1-related domain containing protein
						Os03g0145800	\	Ankyrin repeat containing protein
						Os03g0143100	OsSDD1, OsSub26	Stomatal development
						Os01g0273900	\	Conserved hypothetical protein
						Os01g0300400	\	Hypothetical conserved gene
						Os09g0553300	\	NUDIX hydrolase domain containing protein
						Os11g0297900	\	Similar to Txnl4b protein
						Os04g0616700	\	Hypothetical conserved gene
						Os07g0467900	\	Similar to DNA primase
						Os05g0163000	\	Arginyl-tRNA synthetase, class Ic family protein
						Os06g0660700	\	Similar to Ubiquitin carrier protein
						Os11g0139100	\	Similar to 50S ribosomal protein L24
						Os02g0551100	OsSAPK6, OSRK1, OsSnRK2.6	Serine/threonine protein kinase, Dehydration-inducible SNF1-related protein kinase 2, Hyperosmotic stress response, Abscisic acid
						Os10g0525500	\	Similar to glutathione transferase31
						Os07g0484800	\	Similar to Adenine phosphoribosyltransferase
						Os02g0674700	\	Similar to protein binding protein
						Os05g0511700	\	Putative rRNA methylase family protein
						Os12g0235800	\	Similar to Argininosuccinate synthase
						Os04g0211700	\	Similar to OSIGBa0114M03
						Os01g0962200	\	Similar to Membrane protein
						Os05g0421900	OsGA20ox4, OsPrl5	GA 20-oxidase4, GA metabolism
						Os02g0819500	\	Similar to Cysteine-type peptidase
						Os06g0286351	\	Armadillo-type fold domain containing protein
						Os01g0901200	\	Similar to RecA protein
						Os01g0832900	\	Similar to ATP binding protein
						Os02g0593900	\	Methyltransferase-related domain containing protein
						Os07g0587200	\	NPH3 domain containing protein
						Os10g0548850	\	U box domain domain containing protein
						Os02g0102700	\	Similar to AGL157Cp
						Os02g0607500	\	Putative protein phosphatase 2C 22
						Os12g0420200	YGL6, CSP41b, LGL1	Chloroplast stem-loop-binding protein of 41 kDa b, Chlorophyll biosynthesis and photosynthesis
						Os10g0423400	\	Similar to BTB/POZ domain containing protein
						Os01g0971600	\	Similar to Sn-glycerol-3-phosphate dehydrogenase
						Os07g0676400	\	Hypothetical conserved gene
						Os03g0694900	\	Similar to Valyl-tRNA synthetase
						Os03g0747800	OsOASTL-A1, OsRCS3	O-acetylserine
						Os03g0336300	\	Peptidase M16, core domain containing protein
						Os10g0402200	OsORC3	Origin recognition complex subunit 3, Lateral root development
						Os06g0256500	\	Similar to Glucose-6-phosphate isomerase
						Os11g0676650	\	Similar to DNA-directed RNA polymerase subunit
						Os05g0305100	\	Similar to Transcription factor IIIB 90 kDa subunit
						Os03g0711800	\	Similar to IRE homolog 1
						Os01g0870300	\	Hypothetical conserved gene
						Os04g0433100	\	Similar to H0315E07
						Os01g0976450	\	SET domain domain containing protein
						Os05g0403300	\	Peptidase A1 domain containing protein
						Os01g0942900	\	Similar to cDNA clone:J023028M23, full insert sequence
						Os08g0276400	\	Serine/threonine protein kinase domain containing protein
						Os08g0416100	\	DEAD-like helicase, N-terminal domain containing protein
						Os07g0301500	OsMAK12	Membrane-associated kinase-12
						Os03g0351800	\	Zinc finger, RING/FYVE/PHD-type domain containing protein
						Os09g0559900	\	Protein kinase, core domain containing protein
						Os12g0406200	\	Similar to 40S ribosomal protein S3a
						Os03g0343700	\	Brix domain containing protein
						Os12g0596000	\	Similar to Lipoyltransferase
						Os01g0618200	\	Protein phosphatase 2C family protein
						Os01g0106700	OsATM	PI3Kc
						Os07g0484300	\	Zinc finger, RING/FYVE/PHD-type domain containing protein
						Os06g0306500	\	Similar to aspartic proteinase nepenthesin-2
						Os11g0191300	\	Similar to MEI1 protein
						Os11g0199700	\	Similar to VHS and GAT domain protein
						Os12g0153600	\	Conserved hypothetical protein
						Os04g0177600	\	Similar to Actin-related protein 9
						Os05g0121700	\	DNA repair and recombination, RecA-like domain containing protein
						Os03g0809700	\	Similar to Kinase associated protein phosphatase
						Os08g0528100	\	Similar to Ubiquitin carboxyl-terminal hydrolase
						Os02g0251700	\	Conserved hypothetical protein
						Os03g0565100	\	OST3/OST6 family protein
						Os08g0342400	\	Similar to aspartate kinase-homoserine dehydrogenase
						Os08g0338700	\	Similar to Chaperone GrpE type 2
						Os06g0474200	OsFIP, OsSIP2	Subunit of RNA N6-methyladenosine methyltransferase, Regulation of sporogenesis and embryo development, Male gametogenesis
						Os09g0474300	\	Similar to Heat-shock protein precursor
						Os06g0499900	\	Similar to Dihydrolipoamide acetyltransferase
						Os08g0413000	OsSTL2	Putative cell division cycle protein, Salt tolerance
						Os01g0374000	\	Similar to Glutathione S-transferase I
						Os01g0303600	\	Zinc finger, RING/FYVE/PHD-type domain containing protein
						Os04g0631800	OsRLCK162, OsSDK6	S-Domain kinase-6, Response to drought in tolerant genotype, Response to Xanthomonas oryzae pv
						Os01g0563000	\	Hypothetical conserved gene
						Os07g0523150	\	Similar to 60S ribosomal protein L44
						Os08g0512600	OsCDKB2;1, Oscdc20s-3, CYCB2.1	B-type plant-specific cyclin-dependent kinase, DNA damage response
						Os09g0479300	\	Phenylalanyl-tRNA synthetase, class IIc family protein
						Os04g0661600	OsCNX1	Similar to H0112G12
						Os09g0483400	\	Similar to Ubiquitin/ribosomal fusion protein
						Os02g0598400	\	Hypothetical conserved gene
						Os08g0540500	\	Bicoid-interacting 3 domain containing protein
						Os01g0705300	\	Similar to PDE225/PTAC7
						Os06g0187900	\	RNA recognition motif, RNP-1 domain containing protein
						Os02g0120900	\	Tetrahydrofolate dehydrogenase/cyclohydrolase family protein
						Os03g0248600	\	Similar to Enolase 2
						Os06g0693000	\	Protein kinase, core domain containing protein
						Os07g0515700	\	Similar to cDNA, clone: J100054L12, full insert sequence
						Os08g0527300	\	Peptidase C19, ubiquitin carboxyl-terminal hydrolase 2 domain containing protein
						Os08g0169600	\	RNA polymerase II transcription factor SIII, subunit A domain containing protein
						Os07g0182900	OsMET1-2, OsMET1b	DNA methyltransferase, Maintenance of methylation, Gene silencing
						Os04g0523500	\	Hypothetical conserved gene
						Os12g0517000	\	Cyclin-like F-box domain containing protein
						Os11g0582100	\	Zinc finger, RING/FYVE/PHD-type domain containing protein
						Os08g0278966	\	Similar to predicted protein
						Os05g0182150	\	Hypothetical protein
						Os05g0540800	\	Homeodomain-like containing protein
						Os06g0681400	\	Ubiquitin domain containing protein
						Os01g0101150	\	Hypothetical conserved gene
						Os02g0830100	\	Similar to Oligopeptidase A
						Os05g0207900	OsSPF1	SUMO protease
						Os08g0434000	\	Pentatricopeptide repeat domain containing protein
						Os08g0457600	\	Similar to RSH2
						Os02g0723600	\	Similar to RNA polymerase Rpb3/Rpb11 dimerisation domain containing protein, expressed
						Os01g0943800	\	Similar to cDNA, clone: J100054L12, full insert sequence
						Os03g0265500	OsCOI2	COI1 homolog, Jasmonate signaling
						Os06g0318700	MKRN, OsSIRP3, OsC3H41, OsRING387	Makorin RING finger protein, Pattern formation and organogenesis during embryogenesis and post-embryogenesis
						Os04g0517500	\	Similar to Phosphoenolpyruvate carboxylase kinase
						Os11g0460800	\	Peptidase S10, serine carboxypeptidase family protein
						Os01g0764400	\	Similar to Chorismate mutase, chloroplast precursor
						Os02g0139100	\	Activator of Hsp90 ATPase, N-terminal domain containing protein
						Os02g0517300	\	Topoisomerase II-associated protein PAT1 domain containing protein
						Os01g0739000	\	Similar to Mitochondrial processing peptidase
						Os03g0710100	OsHOP2	Similar to Protein kinase domain containing protein, expressed
						Os09g0367700	OsGSTU5	Tau class glutathione S-transferase, Tolerance against sheath blight disease
						Os10g0415600	\	Non-protein coding transcript
						Os02g0823400	\	Similar to S-adenosyl-L-methionine: beta-alanine N-methyltransferase
						Os11g0497000	OsSAE1	SUMO E1 activating enzyme, Maintenance of Pi homeostasis, Regulation of growth and development
						Os01g0869900	OsSAPK4, OsSnRK2.4	Serine/threonine protein kinase, Hyperosmotic stress response
						Os05g0509700	\	Nucleic acid-binding, OB-fold domain containing protein
						Os03g0297300	\	Similar to 40S ribosomal protein S7
						Os04g0354400	\	Similar to OSIGBa0092G14
						Os09g0363100	AL2, OsCRS1	Chloroplast group IIA intron splicing factor CRS1, Splicing of chloroplast group I and II introns, Chloroplast development
						Os12g0611900	\	Glycosyl transferase, family 17 protein
						Os11g0119200	\	Zinc finger, RING/FYVE/PHD-type domain containing protein
						Os01g0338200	\	Mov34/MPN/PAD-1 family protein
						Os05g0235800	\	DNA-dependent ATPase MCM domain containing protein
						Os11g0265400	\	Glucose/ribitol dehydrogenase family protein
						Os04g0346800	\	Similar to OSIGBa0111I14
						Os03g0430500	\	Peptidase S8/S53, subtilisin/kexin/sedolisin domain containing protein
						Os04g0348300	\	Similar to OSIGBa0130K07
						Os01g0868300	\	Similar to DNA polymerase alpha catalytic subunit
						Os11g0439600	\	Similar to Nod factor binding lectin-nucleotide phosphohydrolase
						Os03g0589300	\	Ovarian tumour, otubain domain containing protein
						Os01g0268300	\	Similar to DNA gyrase B subunit
						Os03g0684500	\	Similar to glycosyltransferase family protein 47

## Sheet: Supplementary Data 4
Supplementary Data 4.1 GeneIDs shown in "lysyl-tRNA aminoacylation" pathway from GO analysis on exclusive ecGenes [Ctrl_D1 vs. Ctrl_D7]
GO (ID)	Biological Process Pathway					geneIDs	gene symbol(s)	Description
GO:0006430	lysyl-tRNA aminoacylation					Os03g0586800	\	Similar to Lysyl-tRNA synthetase
						Os02g0623500	\	Lysyl-tRNA synthetase, class II domain containing protein
Supplementary Data 4.2 GeneIDs shown in "lysine-tRNA ligase activity" pathway from GO analysis on exclusive ecGenes [Ctrl_D1 vs. Ctrl_D7]
GO (ID)	Molecular Function Pathway					geneIDs	gene symbol(s)	Description
GO:0004824	lysine-tRNA ligase activity					Os03g0586800	\	Similar to Lysyl-tRNA synthetase
						Os02g0623500	\	Lysyl-tRNA synthetase, class II domain containing protein

## Sheet: Supplementary Data 5
Supplementary Data 5.1. Summarized GO enrichment on all differential ecGenes under LN treatment [Ctrl_D3 vs. LN_D3]
Group	GO biological process complete	GOnumber	Oryza sativa - REFLIST (43658)	count	expected	over/under	fold Enrichment	raw P-value	FDR
Biological Process	centromere complex assembly	GO:0034508	7	4	0.4	+	10.03	0.00032	0.014
	adenylate cyclase-modulating G protein-coupled receptor signaling pathway	GO:0007188	7	4	0.4	+	10.03	0.00032	0.0139
	terpenoid catabolic process	GO:0016115	16	5	0.91	+	5.48	0.00154	0.0491
	G protein-coupled receptor signaling pathway	GO:0007186	22	6	1.25	+	4.79	0.00115	0.039
	cortical cytoskeleton organization	GO:0030865	28	7	1.6	+	4.39	0.000793	0.0282
	homologous recombination	GO:0035825	43	10	2.45	+	4.08	0.00012	0.00632
	reciprocal meiotic recombination	GO:0007131	39	9	2.22	+	4.05	0.000278	0.0124
	gibberellin metabolic process	GO:0009685	31	7	1.77	+	3.96	0.00152	0.0491
	one-carbon metabolic process	GO:0006730	31	7	1.77	+	3.96	0.00152	0.0487
	transcription by RNA polymerase II	GO:0006366	88	16	5.01	+	3.19	3.41e-05	0.00216
	DNA recombination	GO:0006310	154	25	8.78	+	2.85	2.18e-06	0.000164
	organelle localization	GO:0051640	103	16	5.87	+	2.73	0.000236	0.0112
	positive regulation of transcription by RNA polymerase II	GO:0045944	109	16	6.21	+	2.58	0.000455	0.0186
	chromosome organization	GO:0051276	185	27	10.54	+	2.56	6.96e-06	0.000483
	supramolecular fiber organization	GO:0097435	122	17	6.95	+	2.45	0.000569	0.0222
	terpenoid metabolic process	GO:0006721	137	19	7.81	+	2.43	0.000296	0.0131
	DNA metabolic process	GO:0006259	462	62	26.33	+	2.35	4.42e-10	8.41e-08
	protein-DNA complex organization	GO:0071824	308	41	17.55	+	2.34	6.93e-07	5.61e-05
	cell division	GO:0051301	186	24	10.6	+	2.26	0.000178	0.00875
	cytoskeleton organization	GO:0007010	213	27	12.14	+	2.22	0.000138	0.00712
	isoprenoid metabolic process	GO:0006720	185	23	10.54	+	2.18	0.000605	0.0226
	phospholipid metabolic process	GO:0006644	203	25	11.57	+	2.16	0.000334	0.0143
	cellular response to stress	GO:0033554	576	69	32.82	+	2.1	6.42e-09	9.06e-07
	regulation of transcription by RNA polymerase II	GO:0006357	458	54	26.1	+	2.07	4.56e-07	3.91e-05
	organelle organization	GO:0006996	940	106	53.57	+	1.98	2.91e-11	7.06e-09
	cellular response to endogenous stimulus	GO:0071495	435	49	24.79	+	1.98	5.84e-06	0.000426
	cellular response to organic substance	GO:0071310	460	51	26.21	+	1.95	6.35e-06	0.000448
	protein folding	GO:0006457	226	25	12.88	+	1.94	0.0014	0.0456
	cell cycle process	GO:0022402	300	33	17.1	+	1.93	0.000371	0.0154
	intracellular signal transduction	GO:0035556	307	33	17.5	+	1.89	0.000466	0.0189
	cell cycle	GO:0007049	384	41	21.88	+	1.87	0.000136	0.00709
	ncRNA processing	GO:0034470	376	40	21.43	+	1.87	0.000183	0.00889
	intracellular transport	GO:0046907	471	49	26.84	+	1.83	5.3e-05	0.00317
	cellular response to stimulus	GO:0051716	1800	181	102.58	+	1.76	9.61e-14	3.23e-11
	ncRNA metabolic process	GO:0034660	470	47	26.78	+	1.75	0.00019	0.00913
	negative regulation of biological process	GO:0048519	555	55	31.63	+	1.74	9.21e-05	0.0051
	protein phosphorylation	GO:0006468	414	41	23.59	+	1.74	0.000592	0.0225
	lipid metabolic process	GO:0006629	919	91	52.37	+	1.74	3.72e-07	3.32e-05
	response to oxygen-containing compound	GO:1901700	438	43	24.96	+	1.72	0.00056	0.0221
	signaling	GO:0023052	1047	102	59.67	+	1.71	1.59e-07	1.58e-05
	cell communication	GO:0007154	1094	106	62.34	+	1.7	1.03e-07	1.12e-05
	response to endogenous stimulus	GO:0009719	610	59	34.76	+	1.7	9.36e-05	0.00512
	negative regulation of cellular process	GO:0048523	510	49	29.06	+	1.69	0.000353	0.015
	response to organic substance	GO:0010033	730	70	41.6	+	1.68	2.43e-05	0.00161
	cellular localization	GO:0051641	846	80	48.21	+	1.66	1.19e-05	0.000813
	nucleic acid metabolic process	GO:0090304	1823	172	103.89	+	1.66	8.07e-11	1.76e-08
	protein-containing complex organization	GO:0043933	697	65	39.72	+	1.64	0.0001	0.00541
	cellular component organization or biogenesis	GO:0071840	2176	200	124	+	1.61	2.28e-11	5.85e-09
	cellular component organization	GO:0016043	1892	172	107.82	+	1.6	1.3e-09	2.19e-07
	nucleobase-containing compound metabolic process	GO:0006139	2239	198	127.59	+	1.55	7.08e-10	1.24e-07
	regulation of cellular process	GO:0050794	3603	318	205.32	+	1.55	2.3e-15	8.38e-13
	heterocycle metabolic process	GO:0046483	2476	218	141.1	+	1.55	1.38e-10	2.87e-08
	regulation of biological process	GO:0050789	3849	338	219.34	+	1.54	5.78e-16	2.53e-13
	macromolecule biosynthetic process	GO:0009059	2307	201	131.47	+	1.53	1.68e-09	2.71e-07
	biological regulation	GO:0065007	4112	357	234.33	+	1.52	3.99e-16	1.94e-13
	regulation of metabolic process	GO:0019222	2587	223	147.43	+	1.51	5.79e-10	1.05e-07
	gene expression	GO:0010467	1884	162	107.36	+	1.51	1.92e-07	1.82e-05
	cellular component biogenesis	GO:0044085	967	83	55.11	+	1.51	0.000246	0.0116
	cellular nitrogen compound metabolic process	GO:0034641	2917	250	166.23	+	1.5	7e-11	1.61e-08
	nitrogen compound transport	GO:0071705	853	73	48.61	+	1.5	0.000573	0.0222
	regulation of cellular metabolic process	GO:0031323	2518	215	143.49	+	1.5	2.52e-09	3.93e-07
	protein modification process	GO:0036211	1537	131	87.59	+	1.5	5.15e-06	0.000381
	developmental process	GO:0032502	906	77	51.63	+	1.49	0.000489	0.0196
	macromolecule localization	GO:0033036	849	72	48.38	+	1.49	0.000946	0.0333
	phosphate-containing compound metabolic process	GO:0006796	1993	169	113.58	+	1.49	2.4e-07	2.18e-05
	response to stress	GO:0006950	1991	168	113.46	+	1.48	3.98e-07	3.48e-05
	organic substance biosynthetic process	GO:1901576	3594	303	204.81	+	1.48	3.04e-12	9.48e-10
	anatomical structure development	GO:0048856	820	69	46.73	+	1.48	0.00134	0.0444
	RNA metabolic process	GO:0016070	1388	116	79.1	+	1.47	4.55e-05	0.00276
	biosynthetic process	GO:0009058	3701	309	210.91	+	1.47	5.83e-12	1.7e-09
	organic cyclic compound metabolic process	GO:1901360	2744	229	156.37	+	1.46	4.97e-09	7.49e-07
	phosphorus metabolic process	GO:0006793	2028	169	115.57	+	1.46	6.73e-07	5.66e-05
	defense response	GO:0006952	919	76	52.37	+	1.45	0.00118	0.0396
	response to stimulus	GO:0050896	3751	310	213.76	+	1.45	1.72e-11	4.69e-09
	cellular aromatic compound metabolic process	GO:0006725	2640	218	150.45	+	1.45	3.35e-08	4.3e-06
	cellular biosynthetic process	GO:0044249	3453	285	196.78	+	1.45	1.83e-10	3.63e-08
	macromolecule metabolic process	GO:0043170	5255	433	299.47	+	1.45	7.74e-16	3.07e-13
	nitrogen compound metabolic process	GO:0006807	5873	483	334.69	+	1.44	1.36e-17	7.44e-15
	macromolecule modification	GO:0043412	1979	161	112.78	+	1.43	5.84e-06	0.000419
	cellular metabolic process	GO:0044237	6816	554	388.42	+	1.43	2.34e-19	1.46e-16
	cellular process	GO:0009987	10976	890	625.49	+	1.42	7.07e-34	1.03e-30
	organic substance metabolic process	GO:0071704	7803	631	444.67	+	1.42	7.4e-22	8.09e-19
	primary metabolic process	GO:0044238	7228	583	411.9	+	1.42	9.75e-20	7.1e-17
	cellular nitrogen compound biosynthetic process	GO:0044271	1275	102	72.66	+	1.4	0.000579	0.0222
	small molecule metabolic process	GO:0044281	1324	104	75.45	+	1.38	0.00111	0.0379
	protein metabolic process	GO:0019538	3092	241	176.2	+	1.37	6.92e-07	5.71e-05
	transport	GO:0006810	2302	179	131.18	+	1.36	2.5e-05	0.00163
	localization	GO:0051179	2465	191	140.47	+	1.36	1.67e-05	0.00112
	metabolic process	GO:0008152	9376	726	534.31	+	1.36	1.3e-20	1.13e-17
	organonitrogen compound metabolic process	GO:1901564	4115	317	234.5	+	1.35	2.21e-08	2.92e-06
Molecular Function	phosphoprotein binding	GO:0051219	4	3	0.23	+	13.16	0.000708	0.0307
	beta-1,4-mannosylglycoprotein 4-beta-N-acetylglucosaminyltransferase activity	GO:0003830	4	3	0.23	+	13.16	0.000708	0.0297
	protein phosphorylated amino acid binding	GO:0045309	4	3	0.23	+	13.16	0.000708	0.0288
	G-protein beta/gamma-subunit complex binding	GO:0031683	6	4	0.34	+	11.7	0.000144	0.00722
	G protein-coupled receptor binding	GO:0001664	6	4	0.34	+	11.7	0.000144	0.00709
	RNA polymerase core enzyme binding	GO:0043175	18	7	1.03	+	6.82	3.52e-05	0.0021
	basal RNA polymerase II transcription machinery binding	GO:0001099	22	8	1.25	+	6.38	1.71e-05	0.00115
	basal transcription machinery binding	GO:0001098	22	8	1.25	+	6.38	1.71e-05	0.00112
	RNA polymerase binding	GO:0070063	20	7	1.14	+	6.14	7.76e-05	0.00452
	ATP-dependent DNA damage sensor activity	GO:0140664	23	8	1.31	+	6.1	2.49e-05	0.00159
	aldehyde dehydrogenase [NAD+] activity	GO:0004029	15	5	0.85	+	5.85	0.00111	0.0418
	small molecule sensor activity	GO:0140299	37	11	2.11	+	5.22	4.33e-06	0.000326
	histone binding	GO:0042393	55	10	3.13	+	3.19	0.000982	0.0381
	ATP-dependent activity, acting on DNA	GO:0008094	125	20	7.12	+	2.81	2.7e-05	0.00165
	catalytic activity, acting on DNA	GO:0140097	242	36	13.79	+	2.61	1.4e-07	1.38e-05
	GTPase activity	GO:0003924	181	24	10.31	+	2.33	0.000129	0.00702
	protein-macromolecule adaptor activity	GO:0030674	183	24	10.43	+	2.3	0.000146	0.00705
	molecular adaptor activity	GO:0060090	187	24	10.66	+	2.25	0.000191	0.00906
	GTP binding	GO:0005525	241	29	13.73	+	2.11	0.000136	0.00711
	guanyl nucleotide binding	GO:0019001	241	29	13.73	+	2.11	0.000136	0.00697
	protein-containing complex binding	GO:0044877	342	36	19.49	+	1.85	0.000389	0.0175
	hydrolase activity, acting on acid anhydrides	GO:0016817	775	81	44.17	+	1.83	1.77e-07	1.68e-05
	catalytic activity, acting on a nucleic acid	GO:0140640	780	76	44.45	+	1.71	7.35e-06	0.000523
	ATP-dependent activity	GO:0140657	783	76	44.62	+	1.7	7.65e-06	0.00053
	protein binding	GO:0005515	1859	176	105.94	+	1.66	4.22e-11	5.4e-09
	carbohydrate derivative binding	GO:0097367	3329	302	189.71	+	1.59	3.81e-16	7.51e-14
	purine ribonucleotide binding	GO:0032555	3259	295	185.72	+	1.59	1.38e-15	2.36e-13
	DNA binding	GO:0003677	2160	195	123.09	+	1.58	1.88e-10	2.09e-08
	nucleoside phosphate binding	GO:1901265	3631	326	206.92	+	1.58	9.13e-17	2.34e-14
	heterocyclic compound binding	GO:1901363	3779	339	215.35	+	1.57	1.96e-17	6.29e-15
	anion binding	GO:0043168	3795	336	216.27	+	1.55	2.03e-16	4.72e-14
	hydrolase activity	GO:0016787	3339	280	190.28	+	1.47	4.37e-11	5.33e-09
	transferase activity, transferring phosphorus-containing groups	GO:0016772	1973	165	112.44	+	1.47	7.88e-07	6.73e-05
	transcription regulator activity	GO:0140110	1177	97	67.07	+	1.45	0.000338	0.0155
	ion binding	GO:0043167	7031	577	400.68	+	1.44	3.36e-21	1.44e-18
	small molecule binding	GO:0036094	7183	589	409.34	+	1.44	1.43e-21	7.34e-19
	organic cyclic compound binding	GO:0097159	7986	654	455.1	+	1.44	3.54e-24	2.27e-21
	nucleic acid binding	GO:0003676	3899	316	222.19	+	1.42	1.02e-10	1.19e-08
	binding	GO:0005488	11619	937	662.13	+	1.42	2.48e-35	2.11e-32
	phosphotransferase activity, alcohol group as acceptor	GO:0016773	1654	132	94.26	+	1.4	9.54e-05	0.00543
	transferase activity	GO:0016740	4300	331	245.04	+	1.35	1.22e-08	1.3e-06
	catalytic activity, acting on a protein	GO:0140096	3151	242	179.57	+	1.35	1.94e-06	0.000156
	catalytic activity	GO:0003824	10095	768	575.28	+	1.33	6.33e-20	2.32e-17
	cation binding	GO:0043169	3668	277	209.03	+	1.33	1.24e-06	0.000103
	metal ion binding	GO:0046872	3646	273	207.77	+	1.31	2.95e-06	0.000229
Cellcular Component	GTPase complex	GO:1905360	7	4	0.4	+	10.03	0.00032	0.00941
	heterotrimeric G-protein complex	GO:0005834	7	4	0.4	+	10.03	0.00032	0.0091
	plasma membrane protein complex	GO:0098797	36	9	2.05	+	4.39	0.000144	0.00559
	chromosome, centromeric region	GO:0000775	31	7	1.77	+	3.96	0.00152	0.0287
	nuclear DNA-directed RNA polymerase complex	GO:0055029	95	17	5.41	+	3.14	2.43e-05	0.0013
	actin cytoskeleton	GO:0015629	53	9	3.02	+	2.98	0.00284	0.0484
	membrane coat	GO:0030117	75	12	4.27	+	2.81	0.00105	0.0242
	coated membrane	GO:0048475	75	12	4.27	+	2.81	0.00105	0.0235
	transferase complex	GO:1990234	505	57	28.78	+	1.98	9.74e-07	6.91e-05
	chromosome	GO:0005694	353	38	20.12	+	1.89	0.000184	0.00579
	nuclear protein-containing complex	GO:0140513	624	66	35.56	+	1.86	1.95e-06	0.000119
	vesicle	GO:0031982	360	38	20.52	+	1.85	0.00033	0.00908
	cytoplasmic vesicle	GO:0031410	346	36	19.72	+	1.83	0.000618	0.0155
	nuclear lumen	GO:0031981	491	51	27.98	+	1.82	4.8e-05	0.00227
	intracellular protein-containing complex	GO:0140535	529	50	30.15	+	1.66	0.000611	0.0158
	membrane-enclosed lumen	GO:0031974	650	61	37.04	+	1.65	0.000157	0.00556
	nucleus	GO:0005634	4413	397	251.48	+	1.58	1.28e-20	1.21e-18
	catalytic complex	GO:1902494	1019	91	58.07	+	1.57	2.71e-05	0.00136
	membrane protein complex	GO:0098796	552	49	31.46	+	1.56	0.00219	0.0406
	cytosol	GO:0005829	913	81	52.03	+	1.56	8.98e-05	0.00383
	protein-containing complex	GO:0032991	2699	235	153.81	+	1.53	7.66e-11	5.93e-09
	endomembrane system	GO:0012505	1546	131	88.1	+	1.49	7.15e-06	0.000406
	membrane-bounded organelle	GO:0043227	8078	661	460.34	+	1.44	1.9e-24	2.31e-22
	organelle	GO:0043226	8840	722	503.77	+	1.43	6.52e-27	1.11e-24
	intracellular organelle	GO:0043229	8820	720	502.63	+	1.43	1.03e-26	1.46e-24
	intracellular membrane-bounded organelle	GO:0043231	8057	657	459.15	+	1.43	6.86e-24	7.31e-22
	intracellular anatomical structure	GO:0005622	10370	834	590.96	+	1.41	6.53e-30	1.39e-27
	plasma membrane	GO:0005886	1318	105	75.11	+	1.4	0.000565	0.0151
	cell periphery	GO:0071944	1499	115	85.42	+	1.35	0.00121	0.024
	intracellular non-membrane-bounded organelle	GO:0043232	1580	121	90.04	+	1.34	0.00108	0.0224
	non-membrane-bounded organelle	GO:0043228	1580	121	90.04	+	1.34	0.00108	0.0218
	cytoplasm	GO:0005737	6442	484	367.11	+	1.32	5.23e-11	4.46e-09
	cellular anatomical entity	GO:0110165	17066	1262	972.54	+	1.3	1.17e-33	3.31e-31
	membrane	GO:0016020	8571	584	488.44	+	1.2	1.15e-06	7.52e-05
Supplementary Data 5.2. Summarized GO enrichment on all differential ecGenes under LN treatment [Ctrl_D7 vs. LN_D7]
Group	GO biological process complete	GOnumber	Oryza sativa - REFLIST (43658)	count	expected	over/under	fold Enrichment	raw P-value	FDR
Biological Process	COPII-coated vesicle cargo loading	GO:0090110	9	3	0.21	+	14.25	0.000964	0.0468
	specification of plant organ identity	GO:0090701	9	3	0.21	+	14.25	0.000964	0.0463
	pollen tube development	GO:0048868	19	4	0.44	+	9	0.000871	0.0482
	cell morphogenesis	GO:0000902	47	9	1.1	+	8.19	1.24e-06	0.000361
	multi-multicellular organism process	GO:0044706	29	5	0.68	+	7.37	0.000516	0.0318
	cell growth	GO:0016049	45	7	1.05	+	6.65	7.83e-05	0.00815
	glycosyl compound metabolic process	GO:1901657	33	5	0.77	+	6.48	0.000954	0.0485
	post-embryonic plant organ morphogenesis	GO:0090697	33	5	0.77	+	6.48	0.000954	0.0479
	growth	GO:0040007	60	7	1.4	+	4.99	0.000492	0.0312
	nuclear transport	GO:0051169	97	11	2.27	+	4.85	1.73e-05	0.00244
	nucleocytoplasmic transport	GO:0006913	97	11	2.27	+	4.85	1.73e-05	0.00236
	RNA transport	GO:0050658	66	7	1.54	+	4.54	0.00088	0.0475
	RNA localization	GO:0006403	67	7	1.57	+	4.47	0.000963	0.0478
	cell differentiation	GO:0030154	194	18	4.54	+	3.97	8.37e-07	0.000261
	developmental process involved in reproduction	GO:0003006	323	24	7.55	+	3.18	8.24e-07	0.000277
	isoprenoid biosynthetic process	GO:0008299	151	11	3.53	+	3.12	0.000895	0.0471
	reproductive system development	GO:0061458	301	20	7.04	+	2.84	3.34e-05	0.00418
	positive regulation of RNA metabolic process	GO:0051254	318	20	7.44	+	2.69	7.18e-05	0.00804
	regulation of transcription by RNA polymerase II	GO:0006357	458	28	10.71	+	2.61	4.87e-06	0.00101
	reproduction	GO:0000003	448	27	10.48	+	2.58	9.25e-06	0.00144
	negative regulation of gene expression	GO:0010629	253	15	5.92	+	2.54	0.001	0.0467
	protein-DNA complex organization	GO:0071824	308	18	7.2	+	2.5	0.000393	0.0269
	post-embryonic development	GO:0009791	393	22	9.19	+	2.39	0.000262	0.0204
	cellular localization	GO:0051641	846	43	19.78	+	2.17	2.69e-06	0.000618
	macromolecule localization	GO:0033036	849	43	19.85	+	2.17	2.88e-06	0.000629
	positive regulation of biological process	GO:0048518	547	27	12.79	+	2.11	0.000298	0.0214
	ncRNA metabolic process	GO:0034660	470	23	10.99	+	2.09	0.000996	0.0473
	developmental process	GO:0032502	906	44	21.19	+	2.08	6.4e-06	0.00117
	carbohydrate metabolic process	GO:0005975	1039	50	24.3	+	2.06	2.01e-06	0.000517
	multicellular organismal process	GO:0032501	724	33	16.93	+	1.95	0.000414	0.027
	nitrogen compound transport	GO:0071705	853	37	19.95	+	1.85	0.00035	0.0243
	cellular component organization	GO:0016043	1892	82	44.25	+	1.85	1.32e-07	8.25e-05
	organic substance transport	GO:0071702	1113	48	26.03	+	1.84	7.2e-05	0.00768
	organic cyclic compound biosynthetic process	GO:1901362	880	37	20.58	+	1.8	0.000655	0.0387
	cellular component organization or biogenesis	GO:0071840	2176	90	50.89	+	1.77	1.87e-07	0.000102
	localization	GO:0051179	2465	99	57.65	+	1.72	2.06e-07	0.0001
	establishment of localization	GO:0051234	2393	96	55.96	+	1.72	3.03e-07	0.000132
	regulation of metabolic process	GO:0019222	2587	97	60.5	+	1.6	6.05e-06	0.00115
	regulation of cellular metabolic process	GO:0031323	2518	94	58.89	+	1.6	8.89e-06	0.00144
	organic cyclic compound metabolic process	GO:1901360	2744	99	64.17	+	1.54	2.02e-05	0.00268
	biological regulation	GO:0065007	4112	146	96.16	+	1.52	4e-07	0.000146
	phosphate-containing compound metabolic process	GO:0006796	1993	70	46.61	+	1.5	0.000801	0.0449
	regulation of cellular process	GO:0050794	3603	126	84.26	+	1.5	6.45e-06	0.00113
	organic substance biosynthetic process	GO:1901576	3594	125	84.05	+	1.49	8.38e-06	0.00141
	regulation of biological process	GO:0050789	3849	133	90.01	+	1.48	5.57e-06	0.00111
	cellular aromatic compound metabolic process	GO:0006725	2640	91	61.74	+	1.47	0.000243	0.02
	nucleobase-containing compound metabolic process	GO:0006139	2239	77	52.36	+	1.47	0.000907	0.0472
	heterocycle metabolic process	GO:0046483	2476	85	57.9	+	1.47	0.000454	0.0292
	biosynthetic process	GO:0009058	3701	127	86.55	+	1.47	1.43e-05	0.00208
	cellular process	GO:0009987	10976	376	256.68	+	1.46	7.26e-17	1.06e-13
	primary metabolic process	GO:0044238	7228	247	169.03	+	1.46	3.07e-10	3.36e-07
	cellular biosynthetic process	GO:0044249	3453	116	80.75	+	1.44	8.08e-05	0.00822
	organic substance metabolic process	GO:0071704	7803	261	182.48	+	1.43	6.12e-10	4.46e-07
	metabolic process	GO:0008152	9376	303	219.27	+	1.38	5.82e-10	5.09e-07
	cellular metabolic process	GO:0044237	6816	220	159.4	+	1.38	3.87e-07	0.000154
	macromolecule metabolic process	GO:0043170	5255	158	122.89	+	1.29	0.00092	0.0473
	nitrogen compound metabolic process	GO:0006807	5873	175	137.34	+	1.27	0.000692	0.0398
Molecular Function	phosphatidylinositol phosphate 4-phosphatase activity	GO:0034596	2	2	0.05	+	42.76	0.000546	0.0483
	chloroplast protein-transporting ATPase activity	GO:0016464	2	2	0.05	+	42.76	0.000546	0.0452
	mRNA binding	GO:0003729	490	27	11.46	+	2.36	5.28e-05	0.00564
	sequence-specific double-stranded DNA binding	GO:1990837	398	21	9.31	+	2.26	0.000604	0.0455
	double-stranded DNA binding	GO:0003690	497	25	11.62	+	2.15	0.00043	0.0408
	ATP-dependent activity	GO:0140657	783	39	18.31	+	2.13	1.22e-05	0.00136
	ATP hydrolysis activity	GO:0016887	511	25	11.95	+	2.09	0.000572	0.0458
	RNA binding	GO:0003723	1464	64	34.24	+	1.87	2.33e-06	0.000284
	adenyl ribonucleotide binding	GO:0032559	3030	123	70.86	+	1.74	2.36e-09	7.56e-07
	carbohydrate derivative binding	GO:0097367	3329	133	77.85	+	1.71	1.26e-09	4.61e-07
	nucleoside phosphate binding	GO:1901265	3631	140	84.91	+	1.65	5.27e-09	1.35e-06
	anion binding	GO:0043168	3795	144	88.75	+	1.62	7.76e-09	1.53e-06
	heterocyclic compound binding	GO:1901363	3779	143	88.37	+	1.62	1.03e-08	1.88e-06
	kinase activity	GO:0016301	1787	67	41.79	+	1.6	0.000161	0.0159
	transferase activity, transferring phosphorus-containing groups	GO:0016772	1973	73	46.14	+	1.58	0.000127	0.013
	organic cyclic compound binding	GO:0097159	7986	290	186.76	+	1.55	1.23e-15	7.86e-13
	nucleic acid binding	GO:0003676	3899	141	91.18	+	1.55	2.09e-07	3.15e-05
	hydrolase activity	GO:0016787	3339	119	78.09	+	1.52	5.29e-06	0.000616
	binding	GO:0005488	11619	388	271.72	+	1.43	9.2e-16	7.85e-13
	catalytic activity	GO:0003824	10095	331	236.08	+	1.4	6.6e-12	3.38e-09
	catalytic activity, acting on a protein	GO:0140096	3151	103	73.69	+	1.4	0.000593	0.046
	ion binding	GO:0043167	7031	226	164.43	+	1.37	3.44e-07	4.63e-05
	small molecule binding	GO:0036094	7183	229	167.98	+	1.36	5.4e-07	6.92e-05
Cellcular Component	nucleus	GO:0005634	4413	167	103.2	+	1.62	4.29e-10	5.23e-08
	intracellular non-membrane-bounded organelle	GO:0043232	1580	59	36.95	+	1.6	0.000472	0.0365
	non-membrane-bounded organelle	GO:0043228	1580	59	36.95	+	1.6	0.000472	0.0335
	intracellular anatomical structure	GO:0005622	10370	358	242.51	+	1.48	1.76e-16	3.75e-14
	organelle	GO:0043226	8840	294	206.73	+	1.42	4.93e-11	8.4e-09
	intracellular organelle	GO:0043229	8820	293	206.26	+	1.42	6.2e-11	8.81e-09
	membrane-bounded organelle	GO:0043227	8078	268	188.91	+	1.42	6.35e-10	6.77e-08
	intracellular membrane-bounded organelle	GO:0043231	8057	267	188.42	+	1.42	7.9e-10	7.48e-08
	cytoplasm	GO:0005737	6442	208	150.65	+	1.38	1.04e-06	8.88e-05
	cellular anatomical entity	GO:0110165	17066	530	399.1	+	1.33	5.13e-17	4.37e-14

## Sheet: Supplementary Data 6
Supplementary Data 6.1. GeneIDs shown in "Nitrogen compound metabolic process" pathway from GO analysis on exclusive ecGenes [Ctrl_D3 vs. LN_D3]
GO (ID)	Biological Process Pathway					geneIDs	gene symbol(s)	Description
GO:0006807	nitrogen compound metabolic process					Os08g0436200	\	Zinc finger, RING/FYVE/PHD-type domain containing protein
						Os03g0639700	\	Similar to protein recA
						Os01g0104600	OsDET1	Homolog of Arabidopsis DE-ETIOLATED1 (DET1), Modulation of the ABA signaling pathway and ABA biosynthesis, Regulation of chlorophyll content (Os01t0104600-01);Similar to Light-mediated development protein DET1 (Deetiolated1 homolog) (tDET1) (High pigmentation protein 2) (Protein dark green)
						Os01g0205300	\	Similar to rho termination factor, N-terminal domain containing protein
						Os07g0541900	\	Similar to KI domain interacting kinase 1
						Os05g0494100	OsDrAp2, OsHAPL1, OsDLN150	Histone-like transcription factor, Transcriptional repressor, Repressor of heading date, Inhibition of flowering under long-day condition
						Os04g0434300	\	MiaB-like tRNA modifying enzyme, archaeal-type domain containing protein
						Os04g0432000	OsSAPK7, OsSnRK2.7	Similar to Serine/threonine-protein kinase SAPK7
						Os03g0158700	\	Similar to PA domain containing protein, expressed
						Os12g0288400	\	Similar to Ubiquitin ligase protein mib
						Os02g0463500	\	Peptidase S10, serine carboxypeptidase domain containing protein
						Os10g0191600	\	Similar to 006-203-B11, full insert sequence
						Os03g0750100	\	Similar to TPR Domain containing protein, expressed
						Os12g0101000	\	Similar to RNase P subunit p30 family protein, expressed
						Os02g0511900	\	Similar to DNA polymerase
						Os02g0259900	\	Conserved hypothetical protein
						Os06g0164000	\	Zinc finger, MIZ-type domain containing protein
						Os05g0519500	\	Similar to Periodic tryptophan protein-associated region; WD40-like
						Os05g0141400	\	tRNA/rRNA methyltransferase, SpoU domain containing protein
						Os09g0433900	\	Similar to Alanine aminotransferase 2
						Os01g0925000	\	ENTH/VHS domain containing protein
						Os05g0256500	\	Protein kinase, catalytic domain domain containing protein
						Os02g0722001	\	Similar to Tyrosyl-tRNA synthetase
						Os01g0948100	OsMUS81	Rice homolog of the yeast MUS81 endonuclease gene, Recombinational repair protein, DNA damage response, Maintenance of genome integrity through homologous recombination;Splicing variant of OsMUS81, Recombinational repair protein, DNA damage response
						Os05g0309000	\	Hypothetical conserved gene
						Os09g0362500	\	Peptidase M1, membrane alanine aminopeptidase family protein
						Os05g0349700	OsYGL1, OsCHLG	Chl synthase, Chl biosynthesis;Similar to Chlorophyll synthase
						Os05g0290300	\	Hypothetical conserved gene
						Os05g0452600	\	Similar to 50S ribosomal protein L33
						Os08g0320000	\	Similar to tyrosyl-tRNA synthetase
						Os03g0143100	OsSDD1, OsSub26	Stomatal development
						Os09g0555200	OsNRPD1	Similar to DNA-directed RNA polymerase
						Os02g0497500	\	Similar to DNA repair protein Rad50
						Os10g0560900	\	Pyridoxal phosphate-dependent transferase, major region, subdomain 1 domain containing protein
						Os02g0551100	OsSAPK6, OsSnRK2.6	Serine/threonine protein kinase, Dehydration-inducible SNF1-related protein kinase 2, Hyperosmotic stress response, Abscisic acid (ABA) signaling
						Os09g0249700	\	Protein phosphatase 2A A subunit (Phosphatase 2A regulatory A subunit)
						Os04g0561500	\	Similar to Prolyl endopeptidase
						Os02g0610400	\	Lupus La protein family protein
						Os02g0244300	OsUBP15, OsLG1	Ubiquitin-specific protease, Deubiquitination enzyme, Positive regulation of grain width and size
						Os01g0962200	\	Similar to Membrane protein
						Os01g0536000	\	Similar to CBL-interacting serine/threonine-protein kinase 24
						Os02g0735100	\	Peptidase M48, Ste24p family protein
						Os02g0184000	\	Ankyrin domain containing protein
						Os01g0928600	\	Serine palmitoyltransferase
						Os03g0113700	\	Similar to Heat shock 70 kDa protein, mitochondrial precursor
						Os02g0465900	OsARP, OsCTP	Vacuolar antiporter-regulating protein, Compartmentation of Na+ into vacuole, Salt tolerance
						Os02g0593900	\	Methyltransferase-related domain containing protein
						Os10g0419600	\	Chlorophyllase family protein
						Os08g0141400	\	Similar to mRNA, clone: RTFL01-03-I20
						Os01g0681900	OsGOGAT1, OsGLT1, OsNADH-GOGAT1	Glutamate synthetase, Primary ammonium ions assimilation in seedling roots, Development of tillers, Tolerance to nitrogen-limitation
						Os03g0259300	OsHrd3	Homologue of yeast Hrd3/mammalian SEL1L, ER-resident type I membrane protein, Polyubiquitination of unfolded proteins, Quality control of endoplasmic reticulum-derived protein bodies in rice endosperm
						Os03g0811600	\	Similar to Peptidyl prolyl isomerase H
						Os09g0556500	\	Cysteinyl-tRNA synthetase, class Ia family protein
						Os05g0207300	\	Similar to 60S ribosomal protein L11-2 (L16)
						Os07g0676400	\	Hypothetical conserved gene
						Os11g0148500	OsPK1	Cytosolic pyruvate kinase, Plant morphological development
						Os02g0795300	OsNCA1b, OsRING2	Chaperone protein to regulate catalase (CAT) activity; Similar to protein binding / zinc ion binding
						Os01g0268900	\	Conserved hypothetical protein
						Os07g0513100	\	Similar to RRP6-like protein 3
						Os07g0229800	\	Similar to GLY1; glycerol-3-phosphate dehydrogenase (NAD+)
						Os04g0433100	\	Similar to H0315E07
						Os10g0188100	\	Conserved hypothetical protein
						Os12g0171200	\	Similar to tRNA adenylyltransferase-like protein
						Os06g0691000	\	DNA-repair protein, UmuC-like domain containing protein
						Os05g0540100	\	Flap endonuclease-1a
						Os02g0762800	OsRAD54, OsCHR733	Recombinational repair protein, DNA repair and mitotic recombination
						Os05g0403300	\	Peptidase A1 domain containing protein
						Os08g0425200	\	Chaperonin-like RbcX domain containing protein
						Os01g0942900	\	Similar to cDNA clone:J023028M23, full insert sequence
						Os09g0559900	\	Protein kinase, core domain containing protein
						Os12g0596000	\	Similar to Lipoyltransferase
						Os03g0798600	\	Similar to 40S ribosomal protein S15 (Fragment)
						Os06g0306500	\	Similar to aspartic proteinase nepenthesin-2
						Os05g0159000	\	HECT domain containing protein
						Os12g0153600	\	Conserved hypothetical protein
						Os03g0431200	\	Similar to N-acetyl-glutamate synthase
						Os03g0819100	\	Peptidase M1, membrane alanine aminopeptidase family protein
						Os08g0323600	\	Hypothetical conserved gene
						Os06g0547900	\	Similar to Shaggy-related protein kinase eta
						Os09g0258600	\	Similar to 60S ribosomal protein L17-1
						Os03g0645100	\	Similar to pyruvate dehydrogenase E1 component subunit beta
						Os02g0770000	\	Beta 1 subunit of 20S proteasome
						Os08g0481200	\	Similar to Arm repeat containing protein
						Os12g0207600	\	Similar to ribulose-1, 5-bisphosphate carboxylase/oxygenase large subunit
						Os02g0506500	\	Similar to ubiquitin-activating enzyme E1 domain-containing protein 1
						Os03g0821300	XB15, OsPP2C35, OsPP59, SIP35	Protein phosphatase 2C, Negative regulation of XA21-mediated innate immune response and cell death;Similar to Protein phosphatase 2C 35
						Os02g0193900	\	Similar to Mediator of RNA polymerase II transcription subunit 18
						Os02g0120900	\	Tetrahydrofolate dehydrogenase/cyclohydrolase family protein
						Os04g0680700	\	DNA mismatch repair protein MutS, core domain containing protein
						Os11g0582100	\	Zinc finger, RING/FYVE/PHD-type domain containing protein
						Os08g0278966	\	Similar to predicted protein
						Os09g0446800	\	Similar to Formate--tetrahydrofolate ligase
						Os06g0542200	\	Prephenate dehydrogenase domain containing protein
						Os02g0533900	\	Similar to Carbon-nitrogen hydrolase family protein
						Os06g0681400	\	Ubiquitin domain containing protein
						Os01g0916300	\	Similar to PQBP-1 protein (Nuclear protein containing a WW domain) (Npw38) (JM26 protein)
						Os08g0165800	\	Hypothetical protein
						Os08g0224700	\	Similar to 26S proteasome subunit RPN2a
						Os01g0943800	\	Similar to cDNA, clone: J100054L12, full insert sequence
						Os01g0706200	\	Cullin, N-terminal domain containing protein
						Os06g0318700	MKRN, OsSIRP3, OsC3H41, OsRING387	Makorin RING finger protein, Pattern formation and organogenesis during embryogenesis and post-embryogenesis
						Os01g0278900	\	Similar to 50S ribosomal protein L40
						Os04g0517500	\	Similar to Phosphoenolpyruvate carboxylase kinase
						Os11g0460800	\	Peptidase S10, serine carboxypeptidase family protein
						Os09g0280500	\	Similar to Transcription factor HBP-1b(C38) (Fragment)
						Os08g0424200	\	Similar to Methylcrotonoyl-CoA carboxylase beta chain, mitochondrial precursor
						Os02g0517300	\	Topoisomerase II-associated protein PAT1 domain containing protein
						Os01g0739000	\	Similar to Mitochondrial processing peptidase
						Os01g0150800	\	Protein-tyrosine phosphatase-like, PTPLA domain containing protein
						Os02g0293400	\	Similar to Ubiquitin ligase SINAT5
						Os05g0125000	OsSIZ1	SUMO (small ubiquitin-related modifier) E3-ligase, Abiotic stress response, Stress adaptation
						Os12g0611900	\	Glycosyl transferase, family 17 protein
						Os11g0171300	\	Fructose-bisphosphate aldolase, chloroplast precursor
						Os07g0412400	\	Similar to Adenylate kinase isoenzyme 6
						Os11g0119200	\	Zinc finger, RING/FYVE/PHD-type domain containing protein
						Os02g0804500	\	Molecular chaperone, heat shock protein, Hsp40, DnaJ domain containing protein
						Os05g0235800	\	DNA-dependent ATPase MCM domain containing protein
						Os03g0262400	\	Similar to Eukaryotic translation initiation factor 4E type 3 (eIF4E type 3) (eIF-4E type 3) (mRNA cap-binding protein type 3) (Novel cap-binding protein) (nCBP)
						Os08g0357000	\	Similar to Wound responsive protein
						Os01g0872800	OsPdk1, OsAGC3	3-phosphoinositide-dependent protein kinase, Positive regulation of disease resistance;Similar to 3-phosphoinositide dependent protein kinase 1
						Os01g0868300	\	Similar to DNA polymerase alpha catalytic subunit
						Os06g0705100	\	Similar to Thylakoid lumenal 13
						Os02g0594900	\	Glycosyl transferase, family 17 protein
						Os02g0600400	\	Similar to Glucose-6-phosphate dehydrogenase
						Os03g0837900	\	Streptomyces cyclase/dehydrase family protein
						Os10g0511600	\	Similar to prolyl carboxypeptidase like protein
						Os04g0319600	\	tRNA methyltransferase complex GCD14 subunit domain containing protein
						Os05g0334000	\	Heat shock protein DnaJ family protein
						Os03g0271100	\	Similar to Sigma factor SIG2B
						Os05g0333500	OsDjA7, OsDnaJ	Heat shock protein DnaJ family protein
						Os06g0604300	OsPLDα5	Chloroplast-localized phospholipase D, Herbivore defense
						Os01g0253100	\	Similar to Avr9/Cf-9 induced kinase 1
						Os01g0624000	OsCDase	Ceramidase;Neutral/alkaline nonlysosomal ceramidase family protein
						Os01g0896300	FSM, FAS1	Ortholog of Arabidopsis FASCIATA1, Chromatin assembly factor-1 p150 subunit, Meristem maintenance, Regulation of cell-cycle period
						Os12g0514500	\	Similar to Heat-shock protein precursor
						Os04g0352400	OsFKBP65	FK506-binding protein, Peptidyl-prolyl cis/trans isomerase, Chilling tolerance
						Os03g0740700	\	Protein similar to CwfJ, C-terminal 2 domain containing protein
						Os06g0325500	\	Uncharacterised conserved protein UCP030210 domain containing protein
						Os02g0595900	OsNAR2.1	Partner protein of NRT2, Activator for NRT2, High-affinity nitrate transport
						Os02g0788133	\	Similar to Thioredoxin
						Os10g0476100	\	Similar to Protein kinase MK6
						Os02g0519900	\	Similar to Elongation factor EF-2 (Fragment)
						Os04g0641000	\	Similar to DNA-directed RNA polymerase
						Os05g0553000	\	Similar to ATP synthase subunit beta, mitochondrial
						Os05g0331200	\	Similar to External rotenone-insensitive NADPH dehydrogenase
						Os11g0126400	\	Similar to GDA1/CD39 family protein
						Os03g0197000	\	Di-trans-poly-cis-decaprenylcistransferase-like domain containing protein
						Os03g0701100	\	Similar to Prp18 domain containing protein, expressed
						Os04g0405800	\	Similar to OSIGBa0142C11
						Os04g0589700	\	Zinc finger, RING/FYVE/PHD-type domain containing protein
						Os12g0613250	\	Similar to BTB/POZ; Superoxide dismutase, copper/zinc binding; NPH3
						Os11g0217300	\	Mevalonate and galactokinase family protein
						Os02g0634800	\	Ubiquitin-conjugating enzyme/RWD-like domain containing protein
						Os03g0837000	\	Dcp1-like decapping domain containing protein
						Os06g0498500	\	CCAAT-binding factor domain containing protein
						Os05g0150500	OsTIR1	F-Box auxin receptor protein, Nuclear protein, Flag leaf inclination, Primary root growth, Crown root initiation, Seed development, Tillering
						Os10g0389800	\	Protein kinase, core domain containing protein
						Os01g0323300	OsCAF2	CRM domain-containing protein, Regulation of chloroplast development, Promotion of the splicing of chloroplast group IIA and IIB introns
						Os11g0102200	\	Similar to NPH1-1
						Os04g0616700	\	Hypothetical conserved gene
						Os11g0447300	\	GTP-binding protein, HSR1-related domain containing protein
						Os05g0511700	\	Putative rRNA methylase family protein
						Os01g0578000	OsRAD51C	DNA repair protein, DNA double-strand break repair, synaptonemal complex assembly;Splicing variant of DNA repair protein RAD51C;Splicing variant of DNA repair protein RAD51C
						Os05g0421900	OsGA20ox4, OsPrl5	GA 20-oxidase4, GA metabolism
						Os02g0819500	\	Similar to Cysteine-type peptidase
						Os07g0209000	OsDGL1	Dolichyl-diphosphooligosaccharide-protein glycosyltransferase 48 kDa subunit precursor, N-glycosylation, Root development;Non-protein coding transcript
						Os04g0541500	OsLCBK2	Long-chain base kinase, Regulation of disease resistance response and programmed cell death (PCD)
						Os01g0832900	\	Similar to ATP binding protein
						Os02g0724600	\	Similar to predicted protein
						Os10g0402200	OsORC3	Origin recognition complex subunit 3, Lateral root development
						Os09g0479400	\	Phenylalanyl-tRNA synthetase, class IIc family protein
						Os09g0284400	\	GrpE nucleotide exchange factor domain containing protein
						Os10g0488100	\	Similar to prefoldin subunit 5
						Os06g0256500	\	Similar to Glucose-6-phosphate isomerase
						Os03g0266000	\	Ovarian tumour, otubain domain containing protein
						Os01g0976450	\	SET domain domain containing protein
						Os09g0251500	\	Pentatricopeptide repeat domain containing protein
						Os05g0569700	\	Similar to Glutamine amidotransferase, class I, active site
						Os08g0523000	\	Similar to MAB1
						Os05g0567400	\	Ribosomal RNA methyltransferase J domain containing protein
						Os11g0180600	\	Similar to Type III restriction enzyme, res subunit family protein, expressed
						Os04g0659900	OsPELO, OsLML1, OsSPL34, OsPELOTA	Similar to OSIGBa0132E09-OSIGBa0108L24
						Os06g0137500	\	Similar to predicted protein
						Os03g0343700	\	Brix domain containing protein
						Os01g0106700	OsATM	PI3Kc (Phosphoinositide 3-kinasecatalytic domain) and FATC (FRAP, ATM, TRRAP C-terminal) domain containing protein, ATM homolog, Accurate repair of meiotic double-strand breaks
						Os02g0232100	\	Zinc finger, RING/FYVE/PHD-type domain containing protein
						Os04g0658600	\	Similar to OSIGBa0132E09-OSIGBa0108L24
						Os03g0717600	\	Zinc finger, C2H2-type matrin domain containing protein
						Os05g0492000	\	Similar to BZIP transcription factor
						Os07g0258800	\	Conserved hypothetical protein
						Os02g0612800	\	AT hook, DNA-binding, conserved site domain containing protein
						Os06g0474200	OsFIP, OsSIP2	Subunit of RNA N6-methyladenosine methyltransferase, Regulation of sporogenesis and embryo development, Male gametogenesis
						Os09g0493500	OsTKPR1, OsDFR2, OsCCRL1	Similar to H0404F02
						Os09g0479300	\	Phenylalanyl-tRNA synthetase, class IIc family protein
						Os08g0191900	\	Pentatricopeptide repeat domain containing protein
						Os04g0682600	\	Similar to H0502G05
						Os06g0231400	\	Pentatricopeptide repeat domain containing protein
						Os08g0504400	\	Similar to uncharacterized enzyme involved in pigment biosynthesis
						Os01g0839700	\	Similar to Ubiquitin carrier protein
						Os07g0592200	OsAP65	Aspartic protease, Pollen germination and pollen tube growth;Similar to predicted protein
						Os02g0489400	\	Similar to 40S ribosomal protein S8
						Os11g0217500	\	Similar to mRNA capping enzyme, C-terminal domain containing protein, expressed
						Os03g0248600	\	Similar to Enolase 2
						Os07g0515700	\	Similar to cDNA, clone: J100054L12, full insert sequence
						Os08g0527300	\	Peptidase C19, ubiquitin carboxyl-terminal hydrolase 2 domain containing protein
						Os05g0567500	\	HhH-GPD domain domain containing protein
						Os01g0101150	\	Hypothetical conserved gene
						Os03g0851100	\	Similar to Translational elongation factor EF-TuM
						Os06g0239000	\	Similar to Glucose-inhibited division protein B-like protein
						Os02g0269600	\	Similar to Subtilase
						Os02g0161000	\	Similar to Serine/threonine protein kinase-like protein
						Os11g0302700	\	RecA bacterial DNA recombination family protein
						Os02g0139100	\	Activator of Hsp90 ATPase, N-terminal domain containing protein
						Os09g0367700	OsGSTU5	Tau class glutathione S-transferase, Tolerance against sheath blight disease
						Os01g0232300	\	Similar to TRZ3 (TRNASE Z 3); 3'-tRNA processing endoribonuclease/ catalytic
						Os09g0424300	\	S-adenosylmethionine decarboxylase
						Os03g0643300	OsOAT	Ornithine delta-aminotransferase, Abiotic stress tolerance, Nitrogen reutilization, Floret development and seed setting
						Os09g0363100	AL2	Chloroplast group IIA intron splicing factor CRS1, Splicing of chloroplast group I and II introns, Chloroplast development
						Os02g0233200	\	Similar to Brassinazole-resistant 1 protein
						Os07g0567000	\	Similar to Exostosin-like
						Os05g0334400	OsDjA8	Heat shock protein DnaJ family protein, Chloroplast development and differentiation
						Os05g0313600	\	Pentatricopeptide repeat domain containing protein
						Os11g0672700	OsRecQ1	RecQ DNA helicase, RNA silencing
						Os05g0346500	\	Glycoside hydrolase, family 85 domain containing protein
						Os08g0374400	\	Chaperone DnaJ, C-terminal domain containing protein
						Os11g0156200	\	Peptidase S28 family protein
						Os02g0606100	\	Similar to eukaryotic translation initiation factor-related
						Os05g0150800	\	Similar to Plastid 5, 10-methylene-tetrahydrofolate dehydrogenase (Fragment)
						Os07g0612500	\	Transcription factor TAFII-31 domain containing protein
						Os11g0544700	\	Repressor protein
						Os07g0507300	\	Similar to GCK-like kinase MIK
						Os04g0349500	\	Similar to 40S ribosomal protein S8
						Os10g0462900	\	Similar to mitochondrial chaperonin-60
						Os03g0389100	\	Peptidase C14, caspase catalytic domain containing protein
						Os05g0115900	\	Glycoside hydrolase, family 20 protein
						Os05g0429000	\	Similar to Hydroxymethyltransferase
						Os09g0485900	\	Similar to 60S ribosomal protein L9 (Gibberellin-regulated protein GA)
						Os03g0390200	OsSAPK1, OsSnRK2.1	Serine/threonine protein kinase, Hyperosmotic stress response;Serine/threonine-protein kinase SAPK1
						Os08g0305300	\	Protein prenyltransferase domain containing protein
						Os02g0134300	\	Protein of unknown function DUF701, zinc-binding putative family protein
						Os08g0502700	\	Pyridoxal phosphate-dependent transferase, major region, subdomain 1 domain containing protein
						Os01g0795100	\	Similar to Subtilase
						Os03g0378200	\	GWT1 family protein
						Os06g0663100	\	Similar to Pseudouridylate synthase
						Os03g0755000	\	Similar to Serine/threonine kinase (Fragment)
						Os07g0693500	\	Similar to AMP deaminase 2
						Os06g0645800	\	Similar to Transcription initiation factor TFIID subunit 1
						Os04g0346100	\	Ribosomal protein S27
						Os06g0498900	\	GTP-binding protein, HSR1-related domain containing protein
						Os01g0545500	OsRLCK36, OsGnk2RLK-2	GnK2 domain containing receptor-like kinase-2
						Os11g0255300	\	Cysteine endopeptidase
						Os04g0358000	\	Similar to OSIGBa0104J13
						Os07g0467900	\	Similar to DNA primase
						Os02g0662200	\	YbaK/aminoacyl-tRNA synthetase associated region domain containing protein
						Os11g0311300	\	Exoribonuclease domain containing protein
						Os05g0102600	\	Zinc finger, RING/FYVE/PHD-type domain containing protein
						Os02g0489550	\	Tetratricopeptide TPR-1 domain containing protein
						Os03g0807900	\	Chaperonin-like RbcX family protein
						Os02g0593100	\	Similar to OSIGBa0106G07
						Os05g0536400	\	Similar to Delta-1-pyrroline-5-carboxylate dehydrogenase
						Os07g0109600	\	Leo1-like protein family protein
						Os08g0478500	\	Peptidase C19, ubiquitin carboxyl-terminal hydrolase 2 family protein
						Os07g0587200	\	NPH3 domain containing protein
						Os04g0680550	\	Similar to Tyrosyl-tRNA synthetase
						Os02g0102700	\	Similar to AGL157Cp
						Os08g0401800	\	Similar to Phospholipase D
						Os03g0722400	OsDDM1b,OsDLN98, OsCHR741	Chromatin remodeling factor, Genome-wide DNA methylation
						Os10g0423400	\	Similar to BTB/POZ domain containing protein
						Os01g0971600	\	Similar to Sn-glycerol-3-phosphate dehydrogenase (Fragment)
						Os08g0135400	\	Copine domain containing protein
						Os06g0495700	\	Beta tubulin, autoregulation binding site domain containing protein
						Os06g0183200	OsHK2	Histidine kinase, Cytokinin signaling
						Os05g0305100	\	Similar to Transcription factor IIIB 90 kDa subunit (TFIIIB90) (hTFIIIB90) (B- related factor 1) (BRF-1) (hBRF) (TATA box-binding protein-associated factor, RNA polymerase III, subunit 2) (TAF3B2)
						Os04g0670400	\	Similar to H0624F09
						Os12g0406200	\	Similar to 40S ribosomal protein S3a (CYC07 protein)
						Os02g0635000	OsNIT1	Nitrilase, Regulation of root growth
						Os06g0163400	\	Thioredoxin domain 2 containing protein
						Os03g0565500	\	Similar to Elongation factor G 1, mitochondrial precursor (mEF-G-1) (EFGM)
						Os02g0251700	\	Conserved hypothetical protein
						Os08g0254900	\	Similar to Glutamyl-tRNA reductase binding protein
						Os06g0698785	OsCMO	Similar to Choline monooxygenase
						Os07g0661600	\	Similar to RNA-binding protein-like protein
						Os01g0303600	\	Zinc finger, RING/FYVE/PHD-type domain containing protein
						Os01g0155600	\	Similar to Splicing factor RSZ33
						Os04g0661600	OsCNX1	Similar to H0112G12
						Os09g0483400	\	Similar to Ubiquitin/ribosomal fusion protein (Fragment)
						Os07g0657600	\	Hypothetical conserved gene
						Os04g0120300	\	Similar to OSIGBa0115D20
						Os04g0508200	\	Isocitrate/isopropylmalate dehydrogenase domain containing protein
						Os12g0134300	\	Conserved hypothetical protein
						Os02g0468200	\	Protein of unknown function DUF652 family protein
						Os01g0193600	\	Methyltransferase small domain containing protein
						Os04g0523500	\	Hypothetical conserved gene
						Os02g0197700	\	Di-trans-poly-cis-decaprenylcistransferase-like domain containing protein
						Os12g0517000	\	Cyclin-like F-box domain containing protein
						Os12g0574900	\	Similar to Asparagine synthase family protein
						Os11g0473100	\	Cdk-activating kinase assembly factor (MAT1) family protein
						Os02g0514800	\	Conserved hypothetical protein
						Os02g0830100	\	Similar to Oligopeptidase A
						Os05g0207900	OsSPF1	SUMO protease;Hypothetical conserved gene
						Os04g0496400	\	RNA recognition motif, RNP-1 domain containing protein
						Os12g0485000	\	Similar to O-sialoglycoprotein endopeptidase
						Os02g0723600	\	Similar to RNA polymerase Rpb3/Rpb11 dimerisation domain containing protein, expressed
						Os06g0486800	\	Similar to Formate dehydrogenase, mitochondrial precursor
						Os03g0710100	OsHOP2	Similar to Protein kinase domain containing protein, expressed
						Os09g0103500	\	Pseudouridine synthase domain containing protein
						Os09g0294000	\	Similar to Bifunctional aspartokinase/homoserine dehydrogenase 2, chloroplast precursor (AK-HD 2) (AK-HSDH 2)
						Os08g0491200	\	Serine/threonine protein kinase domain containing protein
						Os12g0446900	\	Similar to bifunctional dihydrofolate reductase-thymidylate synthase
						Os12g0165000	\	WD40 repeat-like domain containing protein
						Os11g0549680	\	Similar to Zinc knuckle family protein, expressed
						Os04g0682300	\	Similar to Phosphomannomutase 2
						Os03g0195200	\	Protein of unknown function DUF367 domain containing protein
						Os01g0338200	\	Mov34/MPN/PAD-1 family protein
						Os03g0227300	\	5'-3' exonuclease domain containing protein
						Os01g0184000	\	NUC156 family protein
						Os11g0207200	\	Similar to MAP3Ka
						Os11g0265400	\	Glucose/ribitol dehydrogenase family protein
						Os09g0452700	\	Ubiquitin
						Os03g0183100	\	SAP-like protein BP-73 (OsBP-73) (Riaa1)
						Os02g0247200	\	Similar to T-complex protein 1, gamma subunit (TCP-1-gamma) (CCT-gamma) (Matricin) (mTRiC-P5)
						Os01g0711000	\	Similar to Vacuolar ATP synthase subunit B isoform 2
						Os07g0154400	\	Armadillo-type fold domain containing protein
						Os12g0562900	\	Prefoldin domain containing protein
						Os09g0368500	OsPAO7	Terminal catabolism-type polyamine oxidase, Anther development
						Os08g0169700	\	Similar to predicted protein
						Os08g0274700	\	Similar to TTN10
						Os08g0113300	\	Similar to STIP1 homology and U box-containing protein 1
						Os02g0586500	\	Similar to OSIGBa0124N08
						Os03g0192100	\	Similar to Serine carboxypeptidase family protein, expressed
						Os07g0541500	\	Similar to KI domain interacting kinase 1
						Os03g0372500	\	Hypothetical gene
						Os01g0926600	\	Similar to Pectin-glucuronyltransferase
						Os02g0725000	\	Similar to Protein kinase G11A
						Os11g0130100	\	Conserved hypothetical protein
						Os02g0702000	OsOTP51, OsSSA1	Pentatricopeptide repeats protein, Splicing of chloroplast mRNA
						Os02g0595100	\	Similar to N-acetylglucosaminyltransferase III
						Os01g0945001	\	Similar to RECA3 (RECA HOMOLOG 3); DNA binding / DNA-dependent ATPase
						Os07g0446100	\	Zinc finger, RING/FYVE/PHD-type domain containing protein
						Os06g0646500	\	Similar to ATP synthase delta chain, mitochondrial precursor
						Os02g0576700	OsNAPL6	Nucleosome assembly protein (NAP) family protein, H3/H4 histone chaperone, Abiotic stress response and adaptation
						Os09g0439050	\	Ribosomal protein L18/L5 domain containing protein
						Os03g0626100	\	Zinc finger, C6HC-type domain containing protein
						Os06g0489200	\	Protein of unknown function DUF1604 domain containing protein
						Os05g0363600	\	Similar to Catalytic/ oxidoreductase, acting on NADH or NADPH
						Os07g0628700	\	Similar to Receptor protein kinase
						Os02g0176100	\	Similar to predicted protein
						Os10g0446800	\	Similar to predicted protein
						Os01g0518500	\	Glycoside hydrolase, family 27 protein
						Os04g0546400	\	Similar to ubiquitin carboxyl-terminal hydrolase isozyme L3
						Os03g0170300	\	3-dehydroquinate synthase family protein
						Os09g0551800	\	Helicase-like, DEXD box c2 type domain containing protein
						Os01g0300400	\	Hypothetical conserved gene
						Os02g0557600	\	Translation initiation factor SUI1 domain containing protein
						Os10g0390100	\	Non-protein coding transcript
						Os05g0163000	\	Arginyl-tRNA synthetase, class Ic family protein
						Os06g0660700	\	Similar to Ubiquitin carrier protein
						Os01g0783400	\	Similar to DNA cross-link repair protein-related
						Os03g0826700	\	SAM (and some other nucleotide) binding motif domain containing protein
						Os10g0525500	\	Similar to glutathione transferase31
						Os04g0211700	\	Similar to OSIGBa0114M03
						Os03g0391000	\	Similar to Cysteine protease ATG4A
						Os05g0129000	OsECS, OsGSH2	Gamma-glutamylcysteine synthetase, Glutathione (GSH) synthesis protein;Similar to cDNA clone:J033125H02, full insert sequence
						Os03g0756500	\	Similar to PAF1 complex component
						Os01g0655400	\	Conserved hypothetical protein
						Os12g0579000	\	Leo1-like protein family protein
						Os01g0901200	\	Similar to RecA protein (Fragment)
						Os06g0520600	\	Similar to Zinc finger CCCH type domain containing protein ZFN-like 1
						Os10g0548850	\	U box domain domain containing protein
						Os08g0128700	\	Kelch related domain containing protein
						Os01g0814800	OsGRA78	Putative S-sulfocysteine synthase, Chloroplast development at the early seedling
						Os07g0678300	\	Similar to CBL-interacting protein kinase 29
						Os01g0837900	\	Similar to Protein kinase AFC1
						Os03g0336300	\	Peptidase M16, core domain containing protein
						Os03g0743200	\	Hypothetical conserved gene
						Os01g0235200	\	Conserved hypothetical protein
						Os05g0235600	\	Similar to Nucleosome assembly protein 1-like protein 2
						Os03g0363900	\	Zinc finger, DHHC-type domain containing protein
						Os11g0676650	\	Similar to DNA-directed RNA polymerase subunit
						Os03g0711800	\	Similar to IRE homolog 1 (Fragment)
						Os07g0203275	\	Ribosomal protein S1, RNA-binding domain domain containing protein
						Os04g0512400	\	Similar to Midline 1 protein (Tripartite motif protein 18)
						Os12g0249900	\	Protein kinase, core domain containing protein
						Os11g0643400	\	Similar to Serine carboxypeptidase family protein
						Os09g0551900	OsFSV1, OsMLH3	Hypothetical conserved gene
						Os08g0276400	\	Serine/threonine protein kinase domain containing protein
						Os08g0416100	\	DEAD-like helicase, N-terminal domain containing protein
						Os10g0511400	\	Peptidase S28 family protein
						Os07g0301500	OsMAK12	Membrane-associated kinase-12
						Os03g0351800	\	Zinc finger, RING/FYVE/PHD-type domain containing protein
						Os06g0163000	\	Similar to Heat shock protein STI (Stress inducible protein) (GmSTI)
						Os03g0209500	\	Zinc finger, DHHC-type domain containing protein
						Os03g0719100	OsSIZ2	SUMO (small ubiquitin-related modifier) E3-ligase, Abiotic stress response, Stress adaptation
						Os04g0551800	\	Similar to T-complex protein 1, alpha subunit (TCP-1-alpha) (CCT-alpha)
						Os06g0354700	OsNYC3	Alpha/beta hydrolase-fold family protein, Chlorophyll degradation during senescence;Similar to Hydrolase, alpha/beta fold family protein
						Os01g0834700	\	Zinc finger, CCCH-type domain containing protein
						Os01g0205500	\	Similar to 60S ribosomal protein L11-2 (L16)
						Os05g0455500	\	Similar to Delta-1-pyrroline-5-carboxylate synthetase
						Os03g0565100	\	OST3/OST6 family protein
						Os03g0385900	\	Mitochondrial ribosomal protein S11 (Nuclear encoded)
						Os01g0928700	\	Similar to Serine palmitoyltransferase
						Os05g0151000	\	Similar to DNA-directed RNA polymerase
						Os09g0474300	\	Similar to Heat-shock protein precursor
						Os04g0628100	\	Similar to Polyubiquitin
						Os06g0281400	\	Similar to DNA topoisomerase
						Os08g0413000	OsSTL2	Putative cell division cycle protein, Salt tolerance
						Os01g0374000	\	Similar to Glutathione S-transferase I
						Os04g0631800	OsRLCK162, OsSDK6	S-Domain kinase-6, Response to drought in tolerant genotype, Response to Xanthomonas oryzae pv
						Os08g0512600	OsCDKB2;1, Oscdc20s-3	B-type plant-specific cyclin-dependent kinase, DNA damage response
						Os10g0580300	\	Serine/threonine protein kinase domain containing protein
						Os07g0622000	OsSAPK2, OsSnRK2.2	Serine/threonine protein kinase, Hyperosmotic stress response, Abscisic acid (ABA)-dependent gene regulation
						Os09g0569400	\	Beta-lactamase-like domain containing protein
						Os02g0598400	\	Hypothetical conserved gene
						Os03g0581600	\	Similar to DAG protein
						Os03g0378000	\	Nucleoside phosphatase GDA1/CD39 family protein
						Os04g0433800	OsRecQl4, OsMed34_1	RecQ like protein, Homolog of mammalian BLM helicase, Maintenance of genome stability during DNA replication, Required for recovery from DNA replication arrest in the meristem
						Os07g0182900	OsMET1b	DNA methyltransferase, Maintenance of methylation, Gene silencing;Maintenance of CpG methylation after DNA replication
						Os04g0464200	OsBADH1, OsALDH10A5	Betaine aldehyde dehydrogenase, Rice fragrance, Salt stress
						Os03g0183600	\	Similar to Alanine aminotransferase
						Os05g0182150	\	Hypothetical protein
						Os05g0540800	\	Homeodomain-like containing protein
						Os04g0683100	\	Similar to Cleavage and polyadenylation specificity factor 5
						Os03g0265500	OsCOI2	COI1 homolog, Jasmonate signaling;Similar to Coronatine-insensitive 1
						Os03g0826500	\	Anthranilate synthase alpha 1 subunit
						Os05g0144800	\	Similar to TFIIH basal transcription factor complex helicase subunit
						Os05g0108500	\	Nucleotide excision repair, TFIIH, subunit TTDA domain containing protein
						Os01g0739400	\	Similar to predicted protein
						Os03g0650400	OsAM1	Similar to ameiotic 1
						Os01g0901000	\	Similar to Arm repeat-containing protein
						Os02g0823400	\	Similar to S-adenosyl-L-methionine: beta-alanine N-methyltransferase (Fragment)
						Os09g0533100	\	Similar to Pantothenate kinase 4 (Fragment)
						Os04g0127200	\	Hypothetical conserved gene
						Os07g0472500	\	Similar to Myosin heavy chain-like protein (Fragment)
						Os01g0180600	\	Similar to MutS homolog 7 (Fragment)
						Os02g0812400	\	Trimeric LpxA-like domain containing protein
						Os02g0762200	\	Zinc finger, CCHC-type domain containing protein
						Os03g0430500	\	Peptidase S8/S53, subtilisin/kexin/sedolisin domain containing protein
						Os04g0348300	\	Similar to OSIGBa0130K07
						Os12g0236400	\	Adenylate kinase A
						Os02g0822200	\	Peptidase C12, ubiquitin carboxyl-terminal hydrolase 1 family protein
						Os05g0319700	\	Similar to Protein kinase-like protein (Fragment)
						Os03g0684500	\	Similar to glycosyltransferase family protein 47
						Os04g0466600	\	Agmatine deiminase domain containing protein
Supplementary Data 6.2. GeneIDs shown in "Nitrogen compound transport" pathway from GO analysis on exclusive ecGenes [Ctrl_D3 vs. LN_D3]
GO (ID)	Biological Process Pathway					geneIDs	gene symbol(s)	Description
GO:0071705	nitrogen compound transport					Os04g0337201	\	Similar to OSIGBa0137O04.8 protein
						Os01g0916200	\	Similar to predicted protein;Clathrin/coatomer adaptor, adaptin-like, N-terminal domain containing protein
						Os02g0209000	\	Hypothetical conserved gene
						Os02g0702800	\	Similar to Syntaxin 22 (AtSYP22) (AtVAM3)
						Os01g0746200	NUP85	Nucleoporin, Common symbiosis signaling (SYM) pathway;Similar to Nucleoporin
						Os08g0535000	\	Similar to cation cation antiporter
						Os04g0421900	\	Similar to H0525E10.11 protein
						Os06g0228800	\	Amino acid transporter, transmembrane domain containing protein. (Os06t0228800-01)
						Os08g0534350	\	Similar to cation cation antiporter
						Os07g0201100	\	Similar to Coatomer gamma subunit (Gamma-coat protein) (Gamma-COP)
						Os03g0417900	\	Similar to ARE1-like protein
						Os03g0282300	\	Hypothetical conserved gene
						Os06g0105600	\	Conserved hypothetical protein
						Os02g0595900	OsNAR2.1, OsNRT3.1A	Partner protein of NRT2, Activator for NRT2, High-affinity nitrate transport
						Os01g0687700	\	Protein of unknown function DUF292, eukaryotic domain containing protein
						Os01g0630200	\	Similar to oligopeptide transporter OPT family
						Os08g0413000	OsSTL2	Putative cell division cycle protein, Salt tolerance
						Os04g0524900	\	Similar to OSIGBa0153E02-OSIGBa0093I20.16 protein
						Os07g0164300	\	Similar to syntaxin 132
						Os04g0195000	\	Similar to Vacuolar assembly protein VPS41 homolog
						Os11g0104900	\	Similar to Clathrin heavy chain
						Os02g0178400	\	Protein transport protein SEC61 gamma subunit
						Os05g0237800	\	Similar to Histidine amino acid transporter
						Os10g0469900	\	TGF-beta receptor, type I/II extracellular region family protein;Similar to peptide transporter PTR2
						Os02g0596100	\	GLE1-like domain containing protein
						Os04g0581300	\	Similar to Mitochondrial import inner membrane translocase subunit TIM13
						Os01g0763700	\	Similar to CRR7 (CHLORORESPIRATORY REDUCTION 7)
						Os01g0356800	\	Domain of unknown function DUF3406, chloroplast translocase domain containing protein
						Os05g0369700	\	Exo70 exocyst complex subunit domain containing protein
						Os09g0548600	\	Similar to 001-003-F02, full insert sequence
						Os03g0227000	\	Similar to Coatomer gamma subunit (Gamma-coat protein) (Gamma-COP)
						Os11g0513900	\	Conserved hypothetical protein
						Os07g0657200	\	WD40/YVTN repeat-like domain containing protein;Similar to Sec31p
						Os05g0311000	\	Clathrin adaptor, mu subunit, C-terminal domain containing protein;Similar to delta-COP
						Os01g0862300	\	Similar to Sorting nexin 1
						Os05g0553700	OsSYP71	Qc-SNARE (soluble N-ethylmaleimide-sensitive factor attachment protein receptor) protein, Tolerance to oxidative stress, Resistance to rice blast
						Os09g0266400	\	PGAP1-like family protein
						Os02g0209100	\	Similar to Coatomer beta' subunit (Beta'-coat protein) (Beta'-COP) (p102)
						Os05g0364700	\	Similar to H0219H12.7 protein
						Os06g0633800	\	Amino acid transporter, transmembrane domain containing protein
						Os07g0409700	\	Mitochondrial import inner membrane translocase, subunit Tim44 family protein
						Os03g0391000	\	Similar to Cysteine protease ATG4A
						Os11g0518900	\	Conserved hypothetical protein
						Os12g0156866	\	Similar to Amino acid permease family protein, expressed
						Os03g0253800	\	Mitochondrial import inner membrane translocase, subunit Tim21 domain containing protein
						Os10g0470700	\	Similar to Peptide transporter
						Os01g0383900	APIP12	Homologue of nucleoporin protein Nup98, Target of the M. oryzae avirulence effector AvrPiz-t, Basal resistance against M. oryzae;Peptidase S59, nucleoporin family protein
						Os07g0583000	\	Ribosome associated membrane RAMP4 family protein
						Os03g0666500	\	Similar to Ras-related protein RHA1
						Os10g0476400	\	Snf7 family protein
						Os06g0523400	\	Nucleotide-sugar transporter family protein
						Os07g0223100	\	Similar to ADP-ribosylation factor 1
						Os01g0698900	\	Similar to nascent polypeptide-associated complex alpha subunit-like protein
						Os03g0369800	OsNPSN12	Qb-SNARE (soluble N-ethylmaleimide-sensitive factor attachment protein receptor) protein, Abiotic stress response
						Os06g0305200	\	Nucleoporin, non-repetitive/WGA-negative domain containing protein;Similar to NUP155 (Nucleoporin 155)
						Os12g0207300	\	Similar to Clathrin coat assembly protein AP17 (Clathrin coat associated protein AP17) (Plasma membrane adaptor AP-2 17 kDa protein) (HA2 17 kDa subunit) (Clathrin assembly protein 2 small chain)
						Os09g0284400	\	GrpE nucleotide exchange factor domain containing protein
						Os05g0101200	\	Peroxisome membrane anchor protein Pex14p, N-terminal domain containing protein
						Os04g0212200	\	Similar to protein binding protein
						Os04g0587500	\	Domain of unknown function DUF250 domain containing protein
						Os03g0323800	\	Similar to ISP42-like protein (Fragment)
						Os03g0282232	\	Conserved hypothetical protein
						Os07g0557400	\	Delayed-early response protein/equilibrative nucleoside transporter family protein
						Os06g0731800	\	Clathrin light chain family protein
						Os03g0734700	\	Mitochondrial substrate carrier family protein
						Os02g0573300	\	Similar to Nucleotide-sugar transporter/ sugar porter
						Os11g0473000	\	Similar to ER lumen protein retaining receptor (HDEL receptor) (PGP169-12)
						Os12g0100100	OsRBD1	RNA binding domain (RBD) containing protein, Abiotic stress tolerance;Similar to ALY protein
						Os11g0517800	\	Conserved hypothetical protein
						Os01g0327600	\	Conserved hypothetical protein

## Sheet: Supplementary Data 7
Supplementary Data 7. GeneIDs shown in "Nitrogen compound transport" pathway from GO analysis on exlusive ecGenes [Ctrl_D7 vs. LN_D7]
GO (ID)	Biological Process Pathway					geneIDs	gene symbol(s)	Description
GO:0071705	nitrogen compound transport					Os11g0195100	\	Similar to Protein translocase subunit secA
						Os01g0708900	\	Mitochondrial substrate carrier family protein
						Os12g0502800	OsUCIP12	Similar to Ureide permease 2
						Os06g0308000	OsTIG	Similar to Trigger factor-like protein
						Os11g0195600	OsAAP11, OsAAP11C	Amino acid permease 11
						Os03g0335300	\	Similar to Vacuolar sorting receptor homolog (Fragment)
						Os12g0583900	\	Similar to PDE135 (PIGMENT DEFECTIVE EMBRYO 135); transmembrane transporter
						Os01g0857400	OsGAT3	Amino acid transporter, transmembrane domain containing protein
						Os01g0200500	\	MPPN family protein
						Os11g0518900	\	Conserved hypothetical protein
						Os11g0157400	OsEXO70A3	Exo70 exocyst complex subunit family protein
						Os08g0451000	\	Sec34-like protein family protein
						Os02g0641800	OsRH8	Similar to RNA helicase (Fragment)
						Os03g0278300	\	Similar to ALY protein
						Os01g0179400	OsSSG4	Amyloplast-localized protein containing DUF490
						Os01g0321300	\	Similar to Protein translocase subunit secA
						Os10g0503700	OsRH12	Similar to ATP-dependent RNA helicase dhh1
						Os12g0154400	\	t-snare domain containing protein
						Os06g0590500	OsSYP124	Similar to Syntaxin 121 (AtSYP121) (Syntaxin-related protein At-Syr1)
						Os12g0568800	\	Similar to predicted protein
						Os12g0430000	\	Hypothetical conserved gene
						Os01g0356800	OsEnS-6	Domain of unknown function DUF3406, chloroplast translocase domain containing protein
						Os06g0556000	OsAAP12A, OsAAP3	Amino acid permease
						Os01g0273000	DSS1, SEM1	Similar to 26 proteasome complex subunit DSS1 (Deleted in split hand/split foot protein 1) (Split hand/foot deleted protein 1)
						Os07g0236800	\	Snf7 family protein
						Os05g0431700	PTR	Similar to peptide transporter PTR2-B
						Os08g0318500	Cen8.t01153	Sec8 exocyst complex component specific domain containing protein
						Os01g0635400	OsDWD67	Similar to mRNA-associated protein mrnp 41 (Rae1 protein homolog)
						Os02g0159200	\	Protein of unknown function DUF292, eukaryotic domain containing protein
						Os07g0152800	\	Similar to Glycine-rich protein
						Os03g0246800	OsSEC7-1, OsGEF15	Similar to Guanine nucleotide-exchange protein GEP2
						Os12g0165900	OsNucAP2	Hypothetical conserved gene
						Os10g0477000	\	Armadillo-like helical domain containing protein
						Os07g0657200	OsSec31p	Rice Sec31p homolog
						Os03g0271200	\	Similar to Chloroplastic outer envelope membrane protein (OEP75) precursor (Outer membrane protein)

## Sheet: Supplementary Data 8
Supplementary Data 8.1. Summarized GO enrichment on all differential ecGenes under LP treatment [Ctrl_D7 vs. LP_D7]
Group	GO biological process complete	GOnumber	Oryza sativa - REFLIST (43658)	count	expected	over/under	fold Enrichment	raw P-value	FDR
Biological Process	cellular process	GO:0009987	10976	221	141.04	+	1.57	8.2e-14	1.19e-10
	cellular component organization	GO:0016043	1892	57	24.31	+	2.34	3.47e-09	3.79e-06
	cellular component organization or biogenesis	GO:0071840	2176	61	27.96	+	2.18	1.35e-08	9.8e-06
	primary metabolic process	GO:0044238	7228	146	92.88	+	1.57	1.17e-08	1.02e-05
	organic substance metabolic process	GO:0071704	7803	153	100.27	+	1.53	3.24e-08	2.02e-05
	metabolic process	GO:0008152	9376	176	120.48	+	1.46	4.61e-08	2.52e-05
	cellular metabolic process	GO:0044237	6816	134	87.58	+	1.53	2.96e-07	0.000144
	cellular nitrogen compound metabolic process	GO:0034641	2917	70	37.48	+	1.87	5.65e-07	0.000225
	protein-containing complex organization	GO:0043933	697	27	8.96	+	3.01	5.22e-07	0.000228
	meristem development	GO:0048507	63	8	0.81	+	9.88	1.47e-06	0.000536
	macromolecule metabolic process	GO:0043170	5255	106	67.52	+	1.57	2.27e-06	0.000765
	cellular aromatic compound metabolic process	GO:0006725	2640	63	33.92	+	1.86	2.66e-06	0.000774
	nucleobase-containing compound metabolic process	GO:0006139	2239	56	28.77	+	1.95	2.63e-06	0.000822
	nucleic acid metabolic process	GO:0090304	1823	48	23.42	+	2.05	3.34e-06	0.000912
	tissue development	GO:0009888	128	10	1.64	+	6.08	6.63e-06	0.0017
	organic cyclic compound metabolic process	GO:1901360	2744	63	35.26	+	1.79	9.54e-06	0.00219
	nitrogen compound metabolic process	GO:0006807	5873	113	75.47	+	1.5	9.03e-06	0.00219
	heterocycle metabolic process	GO:0046483	2476	58	31.82	+	1.82	1.24e-05	0.00258
	protein-RNA complex assembly	GO:0022618	137	10	1.76	+	5.68	1.21e-05	0.00264
	protein-RNA complex organization	GO:0071826	144	10	1.85	+	5.4	1.87e-05	0.0034
	cellular component assembly	GO:0022607	566	21	7.27	+	2.89	1.8e-05	0.00343
	DNA metabolic process	GO:0006259	462	18	5.94	+	3.03	3.77e-05	0.00659
	cytoplasmic translational initiation	GO:0002183	31	5	0.4	+	12.55	4.44e-05	0.00718
	biosynthetic process	GO:0009058	3701	76	47.56	+	1.6	4.79e-05	0.00748
	cellular response to stimulus	GO:0051716	1800	44	23.13	+	1.9	5.99e-05	0.00903
	organic substance biosynthetic process	GO:1901576	3594	74	46.18	+	1.6	7.13e-05	0.0104
	DNA repair	GO:0006281	319	14	4.1	+	3.42	7.8e-05	0.011
	cellular biosynthetic process	GO:0044249	3453	71	44.37	+	1.6	0.000102	0.0139
	translational initiation	GO:0006413	85	7	1.09	+	6.41	0.000116	0.0153
	DNA conformation change	GO:0071103	62	6	0.8	+	7.53	0.000146	0.0188
	organelle organization	GO:0006996	940	27	12.08	+	2.24	0.000169	0.0211
	transport	GO:0006810	2302	51	29.58	+	1.72	0.000181	0.022
	cellular component biogenesis	GO:0044085	967	27	12.43	+	2.17	0.000214	0.024
	cell differentiation	GO:0030154	194	10	2.49	+	4.01	0.000227	0.0248
	response to stress	GO:0006950	1991	45	25.58	+	1.76	0.000312	0.0317
	vesicle-mediated transport	GO:0016192	463	16	5.95	+	2.69	0.000384	0.0382
	meristem maintenance	GO:0010073	49	5	0.63	+	7.94	0.000412	0.04
	developmental process	GO:0032502	906	25	11.64	+	2.15	0.000441	0.0419
	localization	GO:0051179	2465	52	31.67	+	1.64	0.000593	0.0489
Molecular Function	3'-5' DNA helicase activity	GO:0043138	13	4	0.17	+	23.95	1.76e-05	0.0018
	translation initiation factor activity	GO:0003743	80	7	1.03	+	6.81	7.87e-05	0.00672
	ATP-dependent activity, acting on RNA	GO:0008186	80	6	1.03	+	5.84	0.000589	0.0431
	helicase activity	GO:0004386	166	12	2.13	+	5.63	1.83e-06	0.000223
	ATP-dependent activity, acting on DNA	GO:0008094	125	9	1.61	+	5.6	3.66e-05	0.00335
	catalytic activity, acting on DNA	GO:0140097	242	12	3.11	+	3.86	7.98e-05	0.0066
	monoatomic ion transmembrane transporter activity	GO:0015075	391	14	5.02	+	2.79	0.000618	0.044
	ATP-dependent activity	GO:0140657	783	26	10.06	+	2.58	1.33e-05	0.00141
	catalytic activity, acting on a nucleic acid	GO:0140640	780	25	10.02	+	2.49	3.45e-05	0.00327
	RNA binding	GO:0003723	1464	38	18.81	+	2.02	4.74e-05	0.00419
	purine nucleotide binding	GO:0017076	3407	86	43.78	+	1.96	1.69e-09	6.18e-07
	carbohydrate derivative binding	GO:0097367	3329	83	42.78	+	1.94	7.63e-09	1.78e-06
	nucleoside phosphate binding	GO:1901265	3631	88	46.66	+	1.89	7.95e-09	1.57e-06
	anion binding	GO:0043168	3795	91	48.76	+	1.87	6.68e-09	1.71e-06
	heterocyclic compound binding	GO:1901363	3779	88	48.56	+	1.81	5.6e-08	8.97e-06
	transferase activity, transferring phosphorus-containing groups	GO:0016772	1973	44	25.35	+	1.74	0.000446	0.0346
	ion binding	GO:0043167	7031	156	90.35	+	1.73	2.18e-12	1.4e-09
	cation binding	GO:0043169	3668	81	47.13	+	1.72	1.67e-06	0.000214
	metal ion binding	GO:0046872	3646	80	46.85	+	1.71	2.39e-06	0.000278
	small molecule binding	GO:0036094	7183	156	92.3	+	1.69	1.19e-11	6.11e-09
	nucleic acid binding	GO:0003676	3899	83	50.1	+	1.66	6.52e-06	0.000726
	hydrolase activity	GO:0016787	3339	71	42.9	+	1.65	2.87e-05	0.00283
	organic cyclic compound binding	GO:0097159	7986	164	102.62	+	1.6	2.58e-10	1.1e-07
	binding	GO:0005488	11619	232	149.3	+	1.55	3.53e-14	3.01e-11
	catalytic activity	GO:0003824	10095	186	129.72	+	1.43	5.87e-08	8.84e-06
Cellcular Component	CAF-1 complex	GO:0033186	3	2	0.04	+	51.88	0.00049	0.0298
	eukaryotic translation initiation factor 3 complex, eIF3m	GO:0071541	4	2	0.05	+	38.91	0.000972	0.046
	extrinsic component of plasma membrane	GO:0019897	9	3	0.12	+	25.94	0.000167	0.0143
	U12-type spliceosomal complex	GO:0005689	14	3	0.18	+	16.68	0.000691	0.0346
	spliceosomal complex	GO:0005681	141	8	1.81	+	4.42	0.000503	0.0286
	intracellular organelle lumen	GO:0070013	650	19	8.35	+	2.27	0.00109	0.0491
	membrane-enclosed lumen	GO:0031974	650	19	8.35	+	2.27	0.00109	0.0466
	protein-containing complex	GO:0032991	2699	61	34.68	+	1.76	1.94e-05	0.00236
	nucleus	GO:0005634	4413	85	56.71	+	1.5	0.000173	0.0134
	intracellular anatomical structure	GO:0005622	10370	193	133.25	+	1.45	1.04e-08	2.21e-06
	cytoplasm	GO:0005737	6442	117	82.78	+	1.41	9.25e-05	0.00985
	organelle	GO:0043226	8840	159	113.59	+	1.4	3.89e-06	0.000663
	intracellular organelle	GO:0043229	8820	158	113.33	+	1.39	6.26e-06	0.000888
	intracellular membrane-bounded organelle	GO:0043231	8057	139	103.53	+	1.34	0.000187	0.0133
	membrane-bounded organelle	GO:0043227	8078	139	103.8	+	1.34	0.000193	0.0126
	cellular anatomical entity	GO:0110165	17066	289	219.29	+	1.32	2.07e-09	5.88e-07
Supplementary Data 8.2. Summarized GO enrichment on all differential ecGenes under LP treatment [Ctrl_D14 vs. LP_D14]
Group	GO biological process complete	GOnumber	Oryza sativa - REFLIST (43658)	count	expected	over/under	fold Enrichment	raw P-value	FDR
Biological Process	cellular process	GO:0009987	10976	145	89	+	1.63	6.32e-11	9.2e-08
	primary metabolic process	GO:0044238	7228	102	58.61	+	1.74	9.14e-09	9.98e-06
	organic substance metabolic process	GO:0071704	7803	107	63.27	+	1.69	1.2e-08	1.05e-05
	biosynthetic process	GO:0009058	3701	61	30.01	+	2.03	1.3e-07	9.49e-05
	organic substance biosynthetic process	GO:1901576	3594	58	29.14	+	1.99	4.75e-07	0.000296
	cellular biosynthetic process	GO:0044249	3453	54	28	+	1.93	3.77e-06	0.00206
	metabolic process	GO:0008152	9376	112	76.02	+	1.47	8.72e-06	0.00424
	nitrogen compound metabolic process	GO:0006807	5873	78	47.62	+	1.64	9.9e-06	0.00433
	cellular metabolic process	GO:0044237	6816	87	55.27	+	1.57	1.23e-05	0.00449
	regulation of biological process	GO:0050789	3849	57	31.21	+	1.83	1.14e-05	0.00455
	negative regulation of biological process	GO:0048519	555	16	4.5	+	3.56	1.51e-05	0.00472
	biological regulation	GO:0065007	4112	59	33.34	+	1.77	1.5e-05	0.00503
	negative regulation of cellular process	GO:0048523	510	15	4.14	+	3.63	2.21e-05	0.00644
	organic acid metabolic process	GO:0006082	784	19	6.36	+	2.99	2.74e-05	0.00705
	regulation of macroautophagy	GO:0016241	2	2	0.02	+	100	6.56e-05	0.0151
	carboxylic acid metabolic process	GO:0019752	769	18	6.24	+	2.89	6.92e-05	0.0151
	cellular component organization or biogenesis	GO:0071840	2176	36	17.64	+	2.04	6.24e-05	0.0152
	regulation of cellular process	GO:0050794	3603	51	29.21	+	1.75	9.23e-05	0.0183
	response to stimulus	GO:0050896	3751	52	30.41	+	1.71	0.000175	0.0274
	transport	GO:0006810	2302	36	18.67	+	1.93	0.000175	0.0284
	lipid metabolic process	GO:0006629	919	19	7.45	+	2.55	0.000217	0.0305
	localization	GO:0051179	2465	37	19.99	+	1.85	0.000303	0.0348
	regulation of reproductive process	GO:2000241	110	6	0.89	+	6.73	0.000287	0.0349
	sulfur compound biosynthetic process	GO:0044272	110	6	0.89	+	6.73	0.000287	0.0359
	macromolecule metabolic process	GO:0043170	5255	66	42.61	+	1.55	0.000287	0.0369
	vacuolar transport	GO:0007034	74	5	0.6	+	8.33	0.000347	0.037
	lipid biosynthetic process	GO:0008610	517	13	4.19	+	3.1	0.000355	0.037
	macroautophagy	GO:0016236	41	4	0.33	+	12.03	0.00034	0.0371
	cellular catabolic process	GO:0044248	675	15	5.47	+	2.74	0.000472	0.0459
	vesicle-mediated transport	GO:0016192	463	12	3.75	+	3.2	0.000455	0.0462
	organonitrogen compound metabolic process	GO:1901564	4115	54	33.37	+	1.62	0.000467	0.0464
	regulation of cellular component organization	GO:0051128	122	6	0.99	+	6.07	0.0005	0.0475
	gene expression	GO:0010467	1884	30	15.28	+	1.96	0.000511	0.0475
	cellular component organization	GO:0016043	1892	30	15.34	+	1.96	0.000531	0.0484
	gibberellin biosynthetic process	GO:0009686	20	3	0.16	+	18.5	0.000544	0.0485
Molecular Function	protein binding	GO:0005515	1859	32	15.07	+	2.12	8.69e-05	0.0318
	binding	GO:0005488	11619	151	94.21	+	1.6	6.35e-11	1.63e-07
	small molecule binding	GO:0036094	7183	91	58.24	+	1.56	9.67e-06	0.00619
	ion binding	GO:0043167	7031	88	57.01	+	1.54	2.24e-05	0.0115
	organic cyclic compound binding	GO:0097159	7986	97	64.75	+	1.5	2.3e-05	0.0098
Cellcular Component	phosphatidylinositol 3-kinase complex	GO:0005942	6	2	0.05	+	41.11	0.000962	0.0456
	exoribonuclease complex	GO:1905354	18	3	0.15	+	20.56	0.000394	0.0305
	phagophore assembly site	GO:0000407	24	3	0.19	+	15.42	0.000943	0.0472
	chloroplast envelope	GO:0009941	182	7	1.48	+	4.74	0.000756	0.0402
	nuclear protein-containing complex	GO:0140513	624	16	5.06	+	3.16	6.11e-05	0.00521
	endomembrane system	GO:0012505	1546	26	12.54	+	2.07	0.00069	0.0392
	cytoplasm	GO:0005737	6442	97	52.23	+	1.86	6.26e-10	2.67e-07
	protein-containing complex	GO:0032991	2699	39	21.88	+	1.78	0.000511	0.0363
	organelle	GO:0043226	8840	118	71.68	+	1.65	7.75e-09	2.2e-06
	intracellular anatomical structure	GO:0005622	10370	138	84.08	+	1.64	1.52e-10	1.29e-07
	intracellular organelle	GO:0043229	8820	117	71.52	+	1.64	1.19e-08	2.53e-06
	membrane-bounded organelle	GO:0043227	8078	105	65.5	+	1.6	2.99e-07	3.19e-05
	intracellular membrane-bounded organelle	GO:0043231	8057	104	65.33	+	1.59	5.83e-07	5.52e-05
	cellular anatomical entity	GO:0110165	17066	191	138.38	+	1.38	1.43e-08	2.44e-06

## Sheet: Supplementary Data 9
Supplementary Data 9.1. GeneIDs shown in "Nitrogen compound metabolic process" pathway from GO analysis on exclusive ecGenes [Ctrl_D7 vs. LP_D7]
GO (ID)	Biological Process Pathway					geneIDs	gene symbol(s)	Description
GO:0006807	nitrogen compound metabolic process					Os10g0363300	ACC1	Acetyl-CoA carboxylase
						Os01g0779400	\	Zinc finger, RING/FYVE/PHD-type domain containing protein;Similar to chromatin remodeling complex subunit
						Os01g0205300	\	Similar to rho termination factor, N-terminal domain containing protein
						Os03g0158700	\	Similar to PA domain containing protein, expressed;Similar to P69C protein
						Os01g0896300	FSM, FAS1	Ortholog of Arabidopsis FASCIATA1, Chromatin assembly factor-1 p150 subunit, Meristem maintenance, Regulation of cell-cycle period
						Os03g0111100	\	Similar to Dihydrofolate synthetase /folylpolyglutamate synthetase
						Os03g0699200	\	BRCT domain containing protein
						Os06g0103300	\	Similar to Homogentisate 1,2-dioxygenase
						Os04g0165700	\	Cysteine synthase
						Os08g0499100	\	ATPase, AAA+ type, core domain containing protein
						Os04g0610500	\	Peptidase M24A, methionine aminopeptidase, subfamily 1 protein
						Os02g0511900	\	Similar to DNA polymerase
						Os04g0633900	OsSDRLK31	S-Domain receptor like kinase-31
						Os03g0317100	\	Pentatricopeptide repeat domain containing protein
						Os09g0542100	\	Peptidase A1 domain containing protein
						Os02g0722001	\	Similar to Tyrosyl-tRNA synthetase
						Os05g0512000	\	Zinc finger, RING/FYVE/PHD-type domain containing protein
						Os06g0645400	\	Similar to Isoleucine-tRNA ligase-like protein;Similar to ATP binding protein (Fragment)
						Os11g0484300	\	Similar to Mcm2-prov protein
						Os07g0123500	\	BTB/POZ fold domain containing protein
						Os01g0772600	\	Similar to Casein kinase-like protein;Similar to ATP binding protein
						Os03g0680566	\	Tetratricopeptide TPR-1 domain containing protein
						Os02g0554900	\	Similar to Protein disulfide isomerase;Similar to Protein disulfide isomerase-like 1-3
						Os08g0389700	\	Conserved hypothetical protein;Protein of unknown function DUF81 family protein;Similar to cDNA clone:001-103-F02, full insert sequence
						Os02g0580300	OsGF14e, OsGID2	14-3-3 protein, Negative modulation of cell death and disease resistance;F-box protein, Positive regulator of GA signaling
						Os04g0520000	\	S1, RNA binding domain containing protein
						Os02g0119300	\	Peptidase M14, carboxypeptidase A family protein
						Os01g0960300	\	Similar to Glucose inhibited division protein A
						Os05g0534900	\	Pentatricopeptide repeat domain containing protein
						Os03g0165100	\	Pentatricopeptide repeat domain containing protein
						Os02g0593900	\	Methyltransferase-related domain containing protein
						Os01g0127900	\	Mannose-6-phosphate isomerase domain containing protein
						Os08g0308100	\	Similar to TGF-beta receptor-interacting protein 1
						Os11g0171500	OsCDPK14, OsCPK24	Calcium-dependent protein kinase
						Os08g0135400	\	Copine domain containing protein
						Os04g0499300	\	MIF4-like, type 1/2/3 domain containing protein;Similar to Eukaryotic initiation factor-like protein
						Os09g0509200	\	Similar to Pyruvate dehydrogenase E1 beta subunit isoform 3 (EC 1.2.4.1). (Os09t0509200-01);Similar to (Rice Genome Annotation Project) pyruvate dehydrogenase E1 component subunit beta. (Os09t0509200-02)
						Os08g0359500	\	CS domain domain containing protein
						Os12g0564600	\	Zinc finger, CCHC-type domain containing protein;Similar to BRI1-KD interacting protein 117
						Os12g0108500	\	Similar to Leucine Rich Repeat family protein, expressed. (Os12t0108500-01)
						Os01g0784200	OsSDRLK15	S-Domain receptor like kinase-15
						Os10g0485000	\	FF domain containing protein
						Os01g0874100	OsdNK2	Hypothetical conserved gene;Deoxynucleoside kinase family protein
						Os07g0534700	OsGNK2RLK4	GnK2 domain containing receptor-like kinase-4, Response to drought, chilling, and R. solani in tolerant rice genotypes, Response to submergence, Response to B. glumae in resistant rice genotype
						Os04g0103200	\	Proteasome component region PCI domain containing protein
						Os11g0180600	\	Similar to Type III restriction enzyme, res subunit family protein, expressed
						Os09g0570000	\	Serine/threonine protein kinase-related domain containing protein
						Os05g0452900	\	Similar to phosphatidic acid phosphatase-related / PAP2-related;Similar to Phosphatidic acid phosphatase-like protein
						Os06g0196900	\	Similar to Chaperonin;Similar to 20 kDa chaperonin, chloroplast precursor (Protein Cpn21) (Chloroplast protein Cpn10) (Chloroplast chaperonin 10) (Ch-CPN10) (Chaperonin 20)
						Os01g0588700	\	Protein of unknown function DUF572 family protein
						Os06g0138200	\	2OG-Fe(II) oxygenase domain containing protein;Similar to Oxidoreductase
						Os12g0279600	\	Exodeoxyribonuclease III xth family protein
						Os01g0322800	\	WD40 repeat-like domain containing protein
						Os07g0570300	\	Peptidase M16, core domain containing protein
						Os01g0674700	\	Similar to EMB2279 (EMBRYO DEFECTIVE 2279)
						Os04g0616400	\	Similar to H0525G02.12 protein
						Os08g0109000	\	ENTH/VHS domain containing protein
						Os08g0155700	\	Similar to DNA-directed RNA polymerase (Fragment)
						Os02g0521500	\	Peptidase C65, otubain domain containing protein
						Os06g0300800	\	Hypothetical conserved gene;WD40 repeat-like domain containing protein
						Os12g0288600	\	Conserved hypothetical protein
						Os12g0424180	\	Similar to ATP synthase F0 subunit 6
						Os05g0151000	\	Similar to DNA-directed RNA polymerase
						Os06g0304600	\	Peptidase aspartic, catalytic domain containing protein;Similar to Aspartic proteinase nepenthesin-2
						Os02g0179300	\	Similar to RAD23 protein, isoform II;Similar to DNA repair protein RAD23-1
						Os01g0260000	\	Protein prenyltransferase domain containing protein
						Os03g0424000	\	Similar to U-box domain containing protein
						Os06g0116800	OsDjA9	DnaJ protein, Positive regulation of rice immunity against M. oryzae;Similar to GFA2
						Os11g0461000	\	Peptidase S10, serine carboxypeptidase family protein
						Os03g0764300	\	Serine/threonine protein kinase domain containing protein
						Os03g0583900	OsDCL2	Dicer-like protein, Component of RNA silencing machinery, Involved in endogenous dsRNA virus propagation;Similar to Endoribonuclease Dicer homolog 2a
						Os01g0658500	\	ESCRT-II complex, vps25 subunit domain containing protein;Similar to Vacuolar protein sorting protein 25
						Os04g0680700	\	DNA mismatch repair protein MutS, core domain containing protein;Similar to H0901F07.7 protein
						Os07g0492100	\	DNA helicase, UvrD/REP type domain containing protein
						Os07g0222300	OseIF3e	Eukaryotic translation initiation factor 3 subunit E, Organ growth and pollen development
						Os01g0513800	\	Similar to Brix domain containing protein 1 homolog
						Os02g0754700	\	Similar to Histidyl-tRNA synthetase
						Os03g0746500	OsSUV3	NTP-dependent DNA/RNA helicase, Salinity stress tolerance;Similar to predicted protein
						Os02g0173500	\	Similar to Cholinephosphate cytidylyltransferase
						Os03g0656900	OsV1, OsNUS1	Plastid RNA-binding protein, Regulation of chloroplast RNA metabolism, Early chloroplast development under cold stress
						Os04g0480100	\	Eukaryotic translation initiation factor 4B
						Os01g0636600	OsPDF1B2	Peptide deformylase 1B2, Pseudo gene, Non-functional
						Os11g0497000	OsSAE1	SUMO E1 activating enzyme, Maintenance of Pi homeostasis, Regulation of growth and development
						Os08g0550500	\	Similar to Glutathione s-transferase (Fragment)
						Os05g0509700	\	Nucleic acid-binding, OB-fold domain containing protein
						Os05g0207500	OsGSK2, OsBIN2, OsSK22, OsGSK7	GSK3/SHAGGY-like kinase, Brassinosteroid signaling
						Os03g0366000	\	Similar to Chaperonin
						Os12g0165000	\	WD40 repeat-like domain containing protein;Similar to predicted protein
						Os10g0389300	OsRCCR2	Similar to Red chlorophyll catabolite reductase (Fragment)
						Os03g0827700	\	Similar to ATP-dependent RNA helicase
						Os12g0622900	\	Mov34/MPN/PAD-1 family protein
						Os11g0672700	OsRecQ1	RecQ DNA helicase, RNA silencing
						Os11g0545800	\	Similar to regulator of chromosome condensation (RCC1) family protein / UVB-resistance protein-related
						Os08g0127700	\	Similar to Pre-mRNA-splicing factor SLU7
						Os01g0188200	\	Conserved hypothetical protein
						Os07g0154400	\	Armadillo-type fold domain containing protein
						Os01g0734100	\	Similar to 50S ribosomal protein L20
						Os10g0320400	\	Similar to ATP synthase gamma chain, mitochondrial precursor
						Os12g0624000	\	Similar to Methionine synthase protein
						Os07g0179400	\	Dephospho-CoA kinase domain containing protein
Supplementary Data 9.2. GeneIDs shown in "monoatomic cation transmembrane transporter activity" pathway from GO analysis on exclusive ecGenes [Ctrl_D7 vs. LP_D7]
GO (ID)	Molecular Function Pathway					geneIDs	gene symbol(s)	Description
GO:0008324	monoatomic cation transmembrane transporter activity					Os04g0343050	\	Similar to Cytochrome c oxidase subunit 2
						Os03g0137400	OsOSCA4.1	Protein of unknown function DUF221 domain containing protein
						Os02g0498300	\	Similar to non-imprinted in Prader-Willi/Angelman syndrome region protein 1
						Os12g0424180	\	Similar to ATP synthase F0 subunit 6
						Os06g0650800	OsMGT	Similar to MRS2-5
						Os01g0503400	OsNRAMP6	Iron and manganese transporter
						Os01g0610100	\	Similar to Clone ZZZ51 mRNA sequence
						Os12g0638700	OsA3	Plasma membrane H+ ATPase
						Os03g0226400	OsMTP8.1	Manganese transporter
						Os01g0210700	OsKAT2	Inward rectifying shaker-like potassium channel
						Os10g0320400	\	Similar to ATP synthase gamma chain, mitochondrial precursor
						Os02g0196000	OsZIP13	Zinc/iron permease family protein

## Sheet: Supplementary Data 10
Supplementary Data 10.1. GeneIDs shown in "Nitrogen compound metabolic process" pathway from GO analysis on exclusive ecGenes [Ctrl_D14 vs. LP_D14]
GO (ID)	Biological Process Pathway					geneIDs	gene symbol(s)	Description
GO:0006807	nitrogen compound metabolic process					Os03g0236966	OsAPC6	Subunit of anaphase promoting complex/Cyclosome APC6, Endosperm development, Embryo and seed development
						Os08g0111200	\	Beta-glucosidase, GBA2 type domain containing protein
						Os07g0541500	\	Similar to KI domain interacting kinase 1
						Os12g0118800	\	Ankyrin repeat containing protein
						Os08g0379000	\	RNA-processing protein, HAT helix domain containing protein
						Os03g0717600	\	Zinc finger, C2H2-type matrin domain containing protein
						Os01g0916800	\	Similar to predicted protein
						Os02g0710900	\	Heat shock protein Hsp70 family protein
						Os02g0725000	\	Similar to Protein kinase G11A
						Os06g0176200	\	Glycosyl transferase, family 31 protein
						Os07g0585600	\	Similar to N-acetyl-glutamate synthase
						Os08g0338700	\	Similar to Chaperone GrpE type 2
						Os05g0455900	\	Pentatricopeptide repeat domain containing protein
						Os04g0165700	\	Cysteine synthase
						Os11g0430000	\	Similar to serine carboxypeptidase 1
						Os12g0135900	\	Similar to 50S ribosomal protein L24
						Os12g0403800	\	Similar to Exosome complex exonuclease RRP42;Exoribonuclease domain containing protein
						Os05g0339000	\	VHS domain containing protein
						Os03g0811100	OsCHLD, YGL3	Magnesium-chelatase subunit ChlD, Chlorophyll synthesis, Chloroplast development
						Os05g0115900	\	Glycoside hydrolase, family 20 protein;Similar to beta-hexosaminidase beta chain
						Os09g0326800	\	Similar to PSMD2 subunit (Fragment)
						Os03g0319400	OsCIPK31, OsSnRK3.11	Serine/threonine protein kinase, Cold stress tolerance, Abiotic stresses;Similar to CBL-interacting protein kinase 3
						Os02g0728100	\	Similar to SPPA; serine-type endopeptidase;Peptidase S49 domain containing protein
						Os02g0566800	\	Similar to Avr9 elicitor response protein
						Os05g0235300	OsTOR	Serine/threonine (Ser/Thr) protein kinase, Modulation of thylakoid membrane lipid biosynthesis, homeostasis
						Os04g0602800	\	Similar to Yarrowia lipolytica chromosome D of strain CLIB99 of Yarrowia lipolytica;Similar to B0403H10-OSIGBa0105A11.22 protein
						Os12g0580300	\	Similar to TATA-binding protein TBP2
						Os06g0177300	\	Glycosyl transferase, family 31 protein
						Os12g0236500	\	Similar to Aspartyl aminopeptidase-like protein
						Os06g0229200	\	Glycosyl transferase, family 31 protein
						Os07g0171300	\	Protein kinase, core domain containing protein
						Os03g0296400	\	Similar to Eukaryotic translation initiation factor 2 subunit 1 (Eukaryotic translation initiation factor 2 alpha subunit) (eIF-2-alpha) (EIF- 2alpha) (EIF-2A) (Fragment)
						Os01g0977600	\	Hypothetical conserved gene;Armadillo-type fold domain containing protein
						Os06g0546400	\	Similar to 50S ribosomal protein L1
						Os01g0104100	OsNCA1a, OsCOIN, OsRING1	Chaperone protein to regulate catalase (CAT) activity, Cold inducible zinc finger protein, Tolerance to cold, salt and drought
						Os04g0496400	\	RNA recognition motif, RNP-1 domain containing protein
						Os03g0284900	\	Annexin repeat, conserved site domain containing protein
						Os09g0266600	\	NPH3 domain containing protein
						Os02g0112900	\	Similar to Viroid RNA-binding protein (Fragment)
						Os01g0532200	\	FF domain domain containing protein
						Os06g0318700	OsSIRP3, OsC3H41, OsRING387	Makorin RING finger protein, Pattern formation and organogenesis during embryogenesis and post-embryogenesis
						Os10g0487300	\	Forkhead-associated domain containing protein
						Os03g0679700	\	Similar to Thiamine biosynthesis protein thiC
						Os08g0338200	\	Kelch related domain containing protein
						Os01g0739400	\	Similar to predicted protein
						Os11g0242400	\	Similar to Rieske
						Os09g0573200	\	Hypothetical conserved gene;Protein of unknown function DUF3550/UPF0682 domain containing protein.
						Os04g0432500	\	Similar to Protein disulfide isomerase;Similar to H0315E07.1 protein
						Os06g0132600	OsRAD1	Repair protein Rad1/Rec1 domain containing protein;Component of the 9-1-1 complex, Promotion of accurate meiotic double-strand break (DSB) repair
						Os07g0537500	\	Serine/threonine protein kinase-related domain containing protein
						Os05g0536400	\	Similar to Delta-1-pyrroline-5-carboxylate dehydrogenase
						Os11g0216900	\	Similar to IDI2
						Os12g0189900	\	Las1-like family protein
						Os02g0555900	\	Similar to H0315A08.7 protein
						Os11g0109800	\	Pentatricopeptide repeat domain containing protein
						Os12g0556600	\	CTP synthase family protein;Similar to CTP synthase
						Os06g0690200	OsRLCK215	Response to drought or chilling in tolerant genotypes, Response to submergence
						Os04g0486800	\	Similar to predicted protein
						Os01g0965000	\	Similar to DNA-directed RNA polymerase
						Os04g0659100	OsGLN2, OsGS2, OsRGS31	Chloroplastic glutamine synthetase, Reassimilation of the ammonia generated by photorespiration, Salt tolerance;Glutamine synthetase shoot isozyme, chloroplast precursor
						Os07g0191700	\	Similar to AT.I.24-9 protein (Fragment)
						Os08g0191800	\	Similar to Tyrosyl-tRNA synthetase
						Os05g0468600	\	Similar to UGP3 (UDP-GLUCOSE PYROPHOSPHORYLASE 3)
						Os03g0195200	\	Protein of unknown function DUF367 domain containing protein
						Os07g0513100	\	Similar to RRP6-like protein 3
						Os10g0163340	\	Similar to Cytosolic aldolase
						Os11g0431400	\	Similar to Serine carboxypeptidase
						Os05g0256000	\	Similar to TGF-beta receptor-interacting protein 1
						Os03g0356414	OsDIS1, OsRIP5, OsRING80	C3HC4 RING finger E3 ligase, SINA type E3 ligase, Negative regulation of drought stress tolerance
						Os03g0589300	\	Ovarian tumour, otubain domain containing protein
						Os03g0793500	Hd16, EL1, CK1	Casein kinase I, Photoperiodic control of flowering time, Long-day repression
						Os04g0464500	\	SEP domain containing protein
Supplementary Data 10.2. GeneIDs shown in "Regulation of macroautophagy" pathway from GO analysis on exclusive ecGenes [Ctrl_D14 vs. LP_D14]
GO (ID)	Biological Process Pathway					geneIDs	gene symbol(s)	Description
GO:0016241	regulation of macroautophagy					Os05g0235300	OsTOR	Serine/threonine (Ser/Thr) protein kinase
						Os04g0298600	\	Uncharacterised protein family FPL domain containing protein
Supplementary Data 10.3. GeneIDs shown in "phosphatidylinositol 3-kinase complex" pathway from GO analysis on exclusive ecGenes [Ctrl_D14 vs. LP_D14]
GO (ID)	Cellular Component Pathway					geneIDs	gene symbol(s)	Description
GO:0005942	phosphatidylinositol 3-kinase complex					Os08g0307400	\	Similar to Phosphatidylinositol 3-kinase 1
						Os03g0644000	OsATG6b	ATG6/Beclin-1 protein

[truncated: 1 more sheets: Supplementary Data 11]
